# Supplementary material for: Long-term safety and effectiveness of canakinumab therapy in patients with cryopyrin-associated periodic syndrome: results from the β-Confident Registry
Source: HighWire-hosted journal article supplement (doi:10.1136/rmdopen-2021-001663), 2021-05-01
Supplement: rmdopen-2021-001663supp001_data_supplement.pdf [file rmdopen-2021-001663supp001_data_supplement.pdf]

## ONLINE SUPPLEMENTAL MATERIALS

### **Long-term safety and effectiveness of canakinumab therapy in patients with cryopyrin-associated periodic syndrome: results from the $\beta$ -Confident Registry**

Ulrich A Walker<sup>1</sup>, Hugh H Tilson<sup>2</sup>, Philip N Hawkins<sup>3</sup>, Tom van der Poll<sup>4</sup>, Stephanie Noviello<sup>5</sup>, Jeremy Levy<sup>6</sup>, Eleni Vritzali<sup>6</sup>, Hal M Hoffman<sup>7,8</sup>, Jasmin B Kuemmerle-Deschner<sup>9</sup>, on behalf of the CACZ885D2401 Study Investigators

<sup>1</sup>Department of Rheumatology, University Hospital Basel, Basel, Switzerland

<sup>2</sup>Gillings School of Global Public Health, University of North Carolina, Chapel Hill, NC, USA

<sup>3</sup>University College London, London, UK

<sup>4</sup>Amsterdam Medical Center, University of Amsterdam, Amsterdam, The Netherlands

<sup>5</sup>Novartis Pharmaceuticals Corporation, East Hanover, NJ, USA

<sup>6</sup>Novartis Pharma AG, Basel, Switzerland

<sup>7</sup>University of California San Diego, San Diego, CA, USA

<sup>8</sup>Rady Children's Hospital San Diego, San Diego, CA, USA

<sup>9</sup>Division of Paediatric Rheumatology, Department of Paediatrics and Autoinflammation Reference Center Tuebingen, University Hospital Tuebingen, Tuebingen, Germany

#### **Corresponding author:**

Ulrich A. Walker

Department of Rheumatology, University Hospital Basel,

Basel, Switzerland

Tel:+41612652525

Fax:+41612659021

Email: [Ulrich.Walker@usb.ch](mailto:Ulrich.Walker@usb.ch)

**Table S1** Treatment history at enrolment into registry

|                                                                       | <b>FCAS<br/>(N=42)</b> | <b>MWS<br/>(N=169)</b> | <b>NOMID<br/>(N=32)</b> | <b>All CAPS<br/>(N=243)</b> | <b>Other*<br/>(N=42)</b> | <b>All<br/>(N=285)</b> |
|-----------------------------------------------------------------------|------------------------|------------------------|-------------------------|-----------------------------|--------------------------|------------------------|
| IL-1 inhibitor including canakinumab (clinical trial or marketed)     | 35 (83.3)              | 152 (89.9)             | 29 (90.6)               | 216 (88.9)                  | 36 (85.7)                | 252 (88.4)             |
| IL-1 inhibitor including canakinumab in a clinical trial              | 28 (66.7)              | 112 (66.3)             | 25 (78.1)               | 165 (67.9)                  | 24 (57.1)                | 189 (66.3)             |
| Canakinumab prior to enrolment                                        | 34 (81.0)              | 134 (79.3)             | 21 (65.6)               | 189 (77.8)                  | 27 (64.3)                | 216 (75.8)             |
| Canakinumab in a clinical trial                                       | 24 (57.1)              | 71 (42.0)              | 9 (28.1)                | 104 (42.8)                  | 0                        | 104 (36.5)             |
| Marketed canakinumab only                                             | 10 (23.8)              | 63 (37.3)              | 12 (37.5)               | 85 (35.0)                   | 27 (64.3)                | 112 (39.3)             |
| Other IL-1 inhibitor                                                  | 16 (38.1)              | 77 (45.6)              | 24 (75.0)               | 117 (48.1)                  | 24 (57.1)                | 141 (49.5)             |
| Other auto-inflammatory disease medication (excluding IL-1 inhibitor) | 19 (45.2)              | 70 (41.4)              | 19 (59.4)               | 108 (44.4)                  | 29 (69.0)                | 137 (48.1)             |
| Corticosteroids                                                       | 7 (16.7)               | 42 (24.9)              | 15 (46.9)               | 64 (26.3)                   | 24 (57.1)                | 88 (30.9)              |
| NSAIDs                                                                | 14 (33.3)              | 49 (29.0)              | 10 (31.3)               | 73 (30.0)                   | 14 (33.3)                | 87 (30.5)              |
| csDMARD                                                               | 1 (2.4)                | 15 (8.9)               | 8 (25.0)                | 24 (9.9)                    | 14 (33.3)                | 38 (13.3)              |
| Anti-TNF agent                                                        | 0                      | 6 (3.6)                | 5 (15.6)                | 11 (4.5)                    | 9 (21.4)                 | 20 (7.0)               |

|                |         |         |         |          |           |          |
|----------------|---------|---------|---------|----------|-----------|----------|
| IL-6 inhibitor | 0       | 1 (0.6) | 0       | 1 (0.4)  | 1 (2.4)   | 2 (0.7)  |
| Other          | 3 (7.1) | 9 (5.3) | 1 (3.1) | 13 (5.3) | 12 (28.6) | 25 (8.8) |

Values are n (%) unless stated otherwise

\*Other includes atypical CAPS (n=18) and non-CAPS diagnoses (n=24); non-CAPS diagnoses include systemic juvenile idiopathic arthritis, unspecified autoinflammatory syndromes, familial Mediterranean fever, mevalonate kinase deficiency, adult-onset Still's disease, tumour necrosis factor receptor-associated periodic syndrome, Erdheim–Chester disease, Blau syndrome and granulomatosis with polyangiitis.

Canakinumab prior to enrolment refers to canakinumab use at least 28 days before baseline (date of informed consent); other inflammatory inhibitors includes antihistamine, colchicine, dapsone, gold, mesalazine, mycophenolate, tegeline and thalidomide.

csDMARD, conventional synthetic disease modifying rheumatic drugs encompassing methotrexate, azathioprine, cyclophosphamide, and mycophenolic acid/mycophenolate mofetil.

CAPS, cryopyrin-associated periodic syndromes; csDMARD, conventional synthetic disease-modifying antirheumatic drug; FCAS, familial cold autoinflammatory syndrome; IL, interleukin; MWS, Muckle–Wells syndrome; NOMID, neonatal-onset multisystem inflammatory disease; NSAID, non-steroidal anti-inflammatory drug; TNF, tumour necrosis factor.

**Table S2** Baseline canakinumab dose by phenotype

| <b>Dose categories<br/>(mg/kg)</b> | <b>FCAS<br/>(N=42)</b> | <b>MWS<br/>(N=169)</b> | <b>NOMID<br/>(N=32)</b> | <b>All CAPS<br/>(N=243)</b> | <b>Other*<br/>(N=42)</b> | <b>All<br/>(N=285)</b> |
|------------------------------------|------------------------|------------------------|-------------------------|-----------------------------|--------------------------|------------------------|
| <b>&lt;2 mg/kg</b>                 | 16 (38.1)              | 43 (25.4)              | 2 (6.3)                 | 61 (25.1)                   | 9 (21.4)                 | 70 (24.6)              |
| <b>2–&lt;4 mg/kg</b>               | 22 (52.4)              | 83 (49.1)              | 18 (56.3)               | 123 (50.6)                  | 24 (57.1)                | 147 (51.6)             |
| <b>4–&lt;8 mg/kg</b>               | 0                      | 21 (12.4)              | 8 (25.0)                | 29 (11.9)                   | 4 (9.5)                  | 33 (11.6)              |
| <b>&gt;=8 mg/kg</b>                | 0                      | 1 (0.6)                | 3 (9.4)                 | 4 (1.6)                     | 0                        | 4 (1.4)                |

Values are n (%) unless stated otherwise

\*Other includes atypical CAPS (n=18) and non-CAPS diagnoses (n=24); non-CAPS diagnoses include systemic juvenile idiopathic arthritis, unspecified autoinflammatory syndromes, familial Mediterranean fever, mevalonate kinase deficiency, adult-onset Still's disease, tumour necrosis factor receptor-associated periodic syndrome, Erdheim–Chester disease, Blau syndrome and granulomatosis with polyangiitis.

CAPS, cryopyrin-associated periodic syndromes; FCAS, familial cold autoinflammatory syndrome; MWS, Muckle–Wells syndrome; NOMID, neonatal-onset multisystem inflammatory disease.

**Table S3** Changes in audiogram, ophthalmological assessments, and brain MRI from baseline to last available assessment

|                                                    | <b>FCAS<br/>(N=42)</b> | <b>MWS<br/>(N=169)</b> | <b>NOMID<br/>(N=32)</b> | <b>All CAPS<br/>(N=243)</b> | <b>Other*<br/>(N=42)</b> | <b>All<br/>(N=285)</b> |
|----------------------------------------------------|------------------------|------------------------|-------------------------|-----------------------------|--------------------------|------------------------|
| <b>Abnormal audiogram, % (m/n)</b>                 |                        |                        |                         |                             |                          |                        |
| Baseline                                           | 14.3<br>(3/21)         | 57.0<br>(69/121)       | 66.7<br>(14/21)         | 52.8<br>(86/163)            | 50.0<br>(2/4)            | 52.7<br>(88/167)       |
| Last available assessment                          | 0.0<br>(0/11)          | 57.4<br>(66/115)       | 66.7<br>(14/21)         | 54.4<br>(80/147)            | 25.0<br>(2/8)            | 52.9<br>(82/155)       |
| <b>Abnormal ophthalmologic assessment, % (m/n)</b> |                        |                        |                         |                             |                          |                        |
| Baseline                                           | 11.1<br>(2/18)         | 24.7<br>(20/81)        | 50.0<br>(10/20)         | 26.9<br>(32/119)            | 25.0<br>(2/8)            | 26.8<br>(34/127)       |
| Last available assessment                          | 0.0<br>(0/2)           | 15.9<br>(14/88)        | 57.1<br>(12/21)         | 23.4<br>(26/111)            | 15.4<br>(2/13)           | 22.6<br>(28/124)       |
| <b>Abnormal brain MRI assessment, % (m/n)</b>      |                        |                        |                         |                             |                          |                        |
| Baseline                                           | 20.0<br>(3/15)         | 14.0<br>(6/43)         | 37.5<br>(6/16)          | 20.3<br>(15/74)             | 0<br>(0/2)               | 19.7<br>(15/76)        |
| Last available assessment                          | 0.0<br>(0/6)           | 11.4<br>(4/35)         | 35.7<br>(5/14)          | 16.4<br>(9/55)              | 0<br>(0/6)               | 14.8<br>(9/61)         |

% values are calculated based on the number of patients with available data at the time of assessment (m/n)

\*Other includes atypical CAPS (n=18) and non-CAPS diagnoses (n=24); non-CAPS diagnoses include systemic juvenile idiopathic arthritis, unspecified autoinflammatory syndromes, familial Mediterranean fever, mevalonate kinase deficiency, adult-onset Still's disease, tumour necrosis factor receptor-associated periodic syndrome, Erdheim–Chester disease, Blau syndrome and granulomatosis with polyangiitis.

CAPS, cryopyrin-associated periodic syndromes; FCAS, familial cold autoinflammatory syndrome; m, number of patients who reported disease characteristic; MRI, magnetic resonance imaging; MWS, Muckle–Wells syndrome; n, number of patients with available data in subgroup; NOMID, neonatal-onset multisystem inflammatory disease.

**Table S4** Delay in sexual maturation and neurocognitive function at baseline and last available assessment

|                                                  | <b>FCAS<br/>(N=8)</b> | <b>MWS<br/>(N=44)</b> | <b>NOMID<br/>(N=14)</b> | <b>All CAPS<br/>(N=66)</b> | <b>Other*<br/>(N=17)</b> | <b>All<br/>(N=83)</b> |
|--------------------------------------------------|-----------------------|-----------------------|-------------------------|----------------------------|--------------------------|-----------------------|
| <b>Delay in sexual maturation, % (m/n)</b>       |                       |                       |                         |                            |                          |                       |
| Baseline                                         | 0.0<br>(0/6)          | 2.9<br>(1/34)         | 12.5<br>(1/8)           | 4.2<br>(2/48)              | 16.7<br>(2/12)           | 6.7<br>(4/60)         |
| Last available<br>assessment                     | 0.0<br>(0/5)          | 0.0<br>(0/35)         | 0.0<br>(0/9)            | 0.0<br>(0/49)              | 14.3<br>(2/14)           | 3.2<br>(2/63)         |
| <b>Delay in neurocognitive function, % (m/n)</b> |                       |                       |                         |                            |                          |                       |
| Baseline                                         | 0.0<br>(0/7)          | 2.4<br>(1/41)         | 45.5<br>(5/11)          | 10.2<br>(6/59)             | 0.0<br>(0/15)            | 8.1<br>(6/74)         |
| Last available<br>assessment                     | 0.0<br>(0/6)          | 5.1<br>(2/39)         | 30.8<br>(4/13)          | 10.3<br>(6/58)             | 0.0<br>(0/16)            | 8.1<br>(6/74)         |

% values are calculated based on the number of patients with available data at the time of assessment (m/n); data were collected only from patients aged  $\geq 6$  and  $< 18$  years

m = number of patients who reported disease characteristic; n = number of patients with available data in subgroup

\*Other includes atypical CAPS (n=18) and non-CAPS diagnoses (n=24); non-CAPS diagnoses include systemic juvenile idiopathic arthritis, unspecified autoinflammatory syndromes, familial Mediterranean fever, mevalonate kinase deficiency, adult-onset Still's disease, tumour necrosis factor-receptor associated periodic syndrome, Erdheim-Chester disease, Blau syndrome, and granulomatosis with polyangiitis.

CAPS, cryopyrin-associated periodic syndromes; FCAS, familial cold autoinflammatory syndrome; MWS, Muckle–Wells syndrome; NOMID, neonatal-onset multisystem inflammatory disease.



**Table S5** Adverse events by phenotypes

| <b>SOC, Preferred term,<br/>n (IR/ 100 PY)<br/>(95% CI)</b> | <b>FCAS<br/>N= 42</b>      | <b>MWS<br/>N=169</b>         | <b>NOMID<br/>N= 32</b>       | <b>All CAPS<br/>N=243</b>   | <b>Other*<br/>N= 42</b>      | <b>ALL<br/>N=285</b>          |
|-------------------------------------------------------------|----------------------------|------------------------------|------------------------------|-----------------------------|------------------------------|-------------------------------|
| <b>All events</b>                                           | 114 (73.1)<br>[60.3, 87.8] | 681 (105.0)<br>[97.2, 113.2] | 119 (104.6)<br>[86.6, 125.2] | 914 (99.5)<br>[93.2, 106.2] | 200 (143.1)<br>[124.0-164.4] | 1114 (105.3)<br>[99.2, 111.6] |
| <b>Infections and<br/>Infestations</b>                      | 54 (34.6)<br>[26.0, 45.2]  | 244 (37.6)<br>[33.0, 42.6]   | 45 (39.6)<br>[28.8, 52.9]    | 343 (37.3)<br>[33.5, 41.5]  | 59 (42.2)<br>[32.1, 54.5]    | 402 (38.0)<br>[34.4- 41.9]    |
| Nasopharyngitis                                             | 13 (8.3) [4.4, 14.3]       | 69 (10.6) [8.3, 13.5]        | 11 (9.7) [4.8, 17.3]         | 93 (10.1) [8.2, 12.4]       | 7 (5.0) [2.0, 10.3]          | 100 (9.4) [7.7, 11.5]         |
| Gastroenteritis                                             | 6 (3.8) [1.4, 8.4]         | 13 (2.0) [1.1, 3.4]          | 1 (0.9) [0.0, 4.9]           | 20 (2.2) [1.3, 3.4]         | 6 (4.3) [1.6, 9.3]           | 26 (2.5) [1.6, 3.6]           |
| Influenza                                                   | 6 (3.8) [1.4, 8.4]         | 8 (1.2) [0.5, 2.4]           | 2 (1.8) [0.2, 6.3]           | 16 (1.7) [1.0, 2.8]         | 4 (2.9) [0.8, 7.3]           | 20 (1.9) [1.2, 2.9]           |
| Tonsillitis                                                 | 2 (1.3) [0.2, 4.6]         | 11 (1.7) [0.8, 3.0]          | 1 (0.9) [0.0, 4.9]           | 14 (1.5) [0.8, 2.6]         | 5 (3.6) [1.3, 8.3]           | 19 (1.8) [1.2, 2.8]           |
| Urinary tract infection                                     | 3 (1.9) [0.4, 5.6]         | 13 (2.0) [1.1, 3.4]          | 2 (1.8) [0.2, 6.3]           | 18 (2.0) [1.2, 3.1]         | 0 [0.0, 2.7]                 | 18 (1.7) [1.0, 2.7]           |
| Pharyngitis                                                 | 0 [0.0, 2.4]               | 12 (1.8) [1.0, 3.2]          | 2 (1.8) [0.2, 6.3]           | 14 (1.5) [0.8, 2.6]         | 2 (1.4) [0.2, 5.2]           | 16 (1.5) [0.9, 2.5]           |
| Bronchitis                                                  | 1 (0.6) [0.0, 3.6]         | 8 (1.2) [0.5, 2.4]           | 2 (1.8) [0.2, 6.3]           | 11 (1.2) [0.6, 2.1]         | 3 (2.1) [0.4, 6.3]           | 14 (1.3) [0.7, 2.2]           |
| Lower respiratory tract<br>infection                        | 5 (3.2) [1.0, 7.5]         | 4 (0.6) [0.2, 1.6]           | 5 (4.4) [1.4, 10.3]          | 14 (1.5) [0.8, 2.6]         | 0 [0.0, 2.7]                 | 14 (1.3) [0.7, 2.2]           |
| Viral infection                                             | 2 (1.3) [0.2, 4.6]         | 6 (0.9) [0.3, 2.0]           | 1 (0.9) [0.0, 4.9]           | 9 (1.0) [0.4, 1.9]          | 2 (1.4) [0.2, 5.2]           | 11 (1.0) [0.5, 1.9]           |
| Ear infection                                               | 3 (1.9) [0.4, 5.6]         | 5 (0.8) [0.3, 1.8]           | 0 [0.0, 3.2]                 | 8 (0.9) [0.4, 1.7]          | 1 (0.7) [0.0, 4.0]           | 9 (0.9) [0.4, 1.6]            |
| Oral herpes                                                 | 5 (3.2) [1.0, 7.5]         | 3 (0.5) [0.1, 1.4]           | 0 [0.0, 3.2]                 | 8 (0.9) [0.4, 1.7]          | 0 [0.0, 2.7]                 | 8 (0.8) [0.3, 1.5]            |
| Rhinitis                                                    | 0 [0.0, 2.4]               | 5 (0.8) [0.3, 1.8]           | 2 (1.8) [0.2, 6.3]           | 7 (0.8) [0.3, 1.6]          | 1 (0.7) [0.0, 4.0]           | 8 (0.8) [0.3, 1.5]            |

| <b>SOC, Preferred term,<br/>n (IR/ 100 PY)<br/>(95% CI)</b> | <b>FCAS<br/>N= 42</b> | <b>MWS<br/>N=169</b> | <b>NOMID<br/>N= 32</b> | <b>All CAPS<br/>N=243</b> | <b>Other*<br/>N= 42</b> | <b>ALL<br/>N=285</b> |
|-------------------------------------------------------------|-----------------------|----------------------|------------------------|---------------------------|-------------------------|----------------------|
| Pneumonia                                                   | 0 [0.0, 2.4]          | 5 (0.8) [0.3, 1.8]   | 0 [0.0, 3.2]           | 5 (0.5) [0.2, 1.3]        | 2 (1.4) [0.2, 5.2]      | 7 (0.7) [0.3, 1.4]   |
| Sinusitis                                                   | 0 [0.0, 2.4]          | 3 (0.5) [0.1, 1.4]   | 1 (0.9) [0.0, 5.0]     | 4 (0.4) [0.1, 1.1]        | 3 (2.2) [0.4, 6.3]      | 7 (0.7) [0.3, 1.4]   |
| Herpes zoster                                               | 0 [0.0, 2.4]          | 5 (0.8) [0.3, 1.8]   | 0 [0.0, 3.2]           | 5 (0.5) [0.2, 1.3]        | 1 (0.7) [0.0, 4.0]      | 6 (0.6) [0.2, 1.2]   |
| Upper respiratory tract infection                           | 0 [0.0, 2.4]          | 3 (0.5) [0.1, 1.4]   | 0 [0.0, 3.2]           | 3 (0.3) [0.1, 1.0]        | 3 (2.1) [0.4, 6.3]      | 6 (0.6) [0.2, 1.2]   |
| Laryngitis                                                  | 1 (0.6) [0.0, 3.6]    | 4 (0.6) [0.2, 1.6]   | 0 [0.0, 3.2]           | 5 (0.5) [0.2, 1.3]        | 0 [0.0, 2.7]            | 5 (0.5) [0.2, 1.1]   |
| Respiratory tract infection                                 | 0 [0.0, 2.4]          | 2 (0.3) [0.0, 1.1]   | 1 (0.9) [0.0, 4.9]     | 3 (0.3) [0.1, 1.0]        | 2 (1.4) [0.2, 5.2]      | 5 (0.5) [0.2, 1.1]   |
| Viral upper respiratory tract infection                     | 1 (0.6) [0.0, 3.6]    | 2 (0.3) [0.0, 1.1]   | 2 (1.8) [0.2, 6.3]     | 5 (0.5) [0.2, 1.3]        | 0 [0.0, 2.7]            | 5 (0.5) [0.2, 1.1]   |
| Folliculitis                                                | 0 [0.0, 2.4]          | 4 (0.6) [0.2, 1.6]   | 0 [0.0, 3.2]           | 4 (0.4) [0.1, 1.1]        | 0 [0.0, 2.7]            | 4 (0.4) [0.1, 1.0]   |
| Cellulitis                                                  | 0 [0.0, 2.4]          | 2 (0.3) [0.0, 1.1]   | 1 (0.9) [0.0, 4.9]     | 3 (0.3) [0.1, 1.0]        | 0 [0.0, 2.7]            | 3 (0.3) [0.1, 0.8]   |
| Conjunctivitis                                              | 0 [0.0, 2.4]          | 2 (0.3) [0.0, 1.1]   | 1 (0.9) [0.0, 4.9]     | 3 (0.3) [0.1, 1.0]        | 0 [0.0, 2.7]            | 3 (0.3) [0.1, 0.8]   |
| Cystitis                                                    | 0 [0.0, 2.4]          | 1 (0.2) [0.0, 0.9]   | 2 (1.8) [0.2, 6.3]     | 3 (0.3) [0.1, 1.0]        | 0 [0.0, 2.7]            | 3 (0.3) [0.1, 0.8]   |
| Herpes virus infection                                      | 0 [0.0, 2.4]          | 2 (0.3) [0.0, 1.1]   | 1 (0.9) [0.2, 4.9]     | 3 (0.3) [0.1, 1.0]        | 0 [0.0, 2.7]            | 3 (0.3) [0.1, 0.8]   |
| Hordeolum                                                   | 0 [0.0, 2.4]          | 3 (0.5) [0.1, 1.4]   | 0 [0.0, 3.2]           | 3 (0.3) [0.1, 1.0]        | 0 [0.0, 2.7]            | 3 (0.3) [0.1, 0.8]   |
| Onychomycosis                                               | 0 [0.0, 2.4]          | 1 (0.2) [0.0, 0.9]   | 0 [0.0, 3.2]           | 1 (0.1) [0.0, 0.6]        | 2 (1.4) [0.2, 5.2]      | 3 (0.3) [0.1, 0.8]   |
| Otitis externa                                              | 0 [0.0, 2.4]          | 3 (0.5) [0.1, 1.4]   | 0 [0.0, 3.2]           | 3 (0.3) [0.1, 1.0]        | 0 [0.0, 2.7]            | 3 (0.3) [0.1, 0.8]   |

| <b>SOC, Preferred term,<br/>n (IR/ 100 PY)<br/>(95% CI)</b> | <b>FCAS<br/>N= 42</b> | <b>MWS<br/>N=169</b> | <b>NOMID<br/>N= 32</b> | <b>All CAPS<br/>N=243</b> | <b>Other*<br/>N= 42</b> | <b>ALL<br/>N=285</b> |
|-------------------------------------------------------------|-----------------------|----------------------|------------------------|---------------------------|-------------------------|----------------------|
| Pharyngitis streptococcal                                   | 0 [0.0, 2.4]          | 3 (0.5) [0.1, 1.4]   | 0 [0.0, 3.2]           | 3 (0.3) [0.1, 1.0]        | 0 [0.0, 2.7]            | 3 (0.3) [0.1, 0.8]   |
| Pyelonephritis                                              | 0 [0.0, 2.4]          | 2 (0.3) [0.0, 1.1]   | 0 [0.0, 3.2]           | 2 (0.2) [0.0, 0.8]        | 1 (0.7) [0.0, 4.0]      | 3 (0.3) [0.1, 0.8]   |
| Varicella                                                   | 0 [0.0, 2.4]          | 2 (0.3) [0.0, 1.1]   | 0 [0.0, 3.2]           | 2 (0.2) [0.0, 0.8]        | 1 (0.7) [0.0, 4.0]      | 3 (0.3) [0.1, 0.8]   |
| Abscess                                                     | 0 [0.0, 2.4]          | 2 (0.3) [0.0, 1.1]   | 0 [0.0, 3.2]           | 2 (0.2) [0.0, 0.8]        | 0 [0.0, 2.7]            | 2 (0.2) [0.0, 0.7]   |
| Campylobacter infection                                     | 2 (1.3) [0.2, 4.6]    | 0 [0.0, 0.6]         | 0 [0.0, 3.2]           | 2 (0.2) [0.0, 0.8]        | 0 [0.0, 2.7]            | 2 (0.2) [0.0, 0.7]   |
| Gastroenteritis viral                                       | 0 [0.0, 2.4]          | 2 (0.3) [0.0, 1.1]   | 0 [0.0, 3.2]           | 2 (0.2) [0.0, 0.8]        | 0 [0.0, 2.7]            | 2 (0.2) [0.0, 0.7]   |
| Gingivitis                                                  | 0 [0.0, 2.4]          | 2 (0.3) [0.0, 1.1]   | 0 [0.0, 3.2]           | 2 (0.2) [0.0, 0.8]        | 0 [0.0, 2.7]            | 2 (0.2) [0.0, 0.7]   |
| Impetigo                                                    | 0 [0.0, 2.4]          | 1 (0.2) [0.0, 0.9]   | 0 [0.0, 3.2]           | 1 (0.1) [0.0, 0.6]        | 1 (0.7) [0.0, 4.0]      | 2 (0.2) [0.0, 0.7]   |
| Infection susceptibility increased                          | 0 [0.0, 2.4]          | 2 (0.3) [0.0, 1.1]   | 0 [0.0, 3.2]           | 2 (0.2) [0.0, 0.8]        | 0 [0.0, 2.7]            | 2 (0.2) [0.0, 0.7]   |
| Meningitis                                                  | 0 [0.0, 2.4]          | 0 [0.0, 0.6]         | 2 (1.8) [0.1, 6.4]     | 2 (0.2) [0.0, 0.8]        | 0 [0.0, 2.7]            | 2 (0.2) [0.0, 0.7]   |
| Perirectal abscess                                          | 0 [0.0, 2.4]          | 2 (0.3) [0.0, 1.1]   | 0 [0.0, 3.2]           | 2 (0.2) [0.0, 0.8]        | 0 [0.0, 2.7]            | 2 (0.2) [0.0, 0.7]   |
| Skin infection                                              | 0 [0.0, 2.4]          | 2 (0.3) [0.0, 1.1]   | 0 [0.0, 3.2]           | 2 (0.2) [0.0, 0.8]        | 0 [0.0, 2.7]            | 2 (0.2) [0.0, 0.7]   |
| Tooth abscess                                               | 2 (1.3) [0.2, 4.6]    | 0 [0.0, 0.6]         | 0 [0.0, 3.2]           | 2 (0.2) [0.0, 0.8]        | 0 [0.0, 2.7]            | 2 (0.2) [0.0, 0.7]   |
| Tooth infection                                             | 0 [0.0, 2.4]          | 2 (0.3) [0.0, 1.1]   | 0 [0.0, 3.2]           | 2 (0.2) [0.0, 0.8]        | 0 [0.0, 2.7]            | 2 (0.2) [0.0, 0.7]   |
| Viral rash                                                  | 0 [0.0, 2.4]          | 2 (0.3) [0.0, 1.1]   | 0 [0.0, 3.2]           | 2 (0.2) [0.0, 0.8]        | 0 [0.0, 2.7]            | 2 (0.2) [0.0, 0.7]   |

| <b>SOC, Preferred term,<br/>n (IR/ 100 PY)<br/>(95% CI)</b> | <b>FCAS<br/>N= 42</b> | <b>MWS<br/>N=169</b> | <b>NOMID<br/>N= 32</b> | <b>All CAPS<br/>N=243</b> | <b>Other*<br/>N= 42</b> | <b>ALL<br/>N=285</b> |
|-------------------------------------------------------------|-----------------------|----------------------|------------------------|---------------------------|-------------------------|----------------------|
| Vulvovaginal candidiasis                                    | 1 (0.6) [0.0, 3.6]    | 1 (0.2) [0.0, 0.9]   | 0 [0.0, 3.2]           | 2 (0.2) [0.0, 0.8]        | 0 [0.0, 2.7]            | 2 (0.2) [0.0, 0.7]   |
| Abscess jaw                                                 | 0 [0.0, 2.4]          | 1 (0.2) [0.0, 0.9]   | 0 [0.0, 3.2]           | 1 (0.1) [0.0, 0.6]        | 0 [0.0, 2.7]            | 1 (0.1) [0.0, 0.5]   |
| Abscess limb                                                | 0 [0.0, 2.4]          | 1 (0.2) [0.0, 0.9]   | 0 [0.0, 3.2]           | 1 (0.1) [0.0, 0.6]        | 0 [0.0, 2.7]            | 1 (0.1) [0.0, 0.5]   |
| Acne pustular                                               | 0 [0.0, 2.4]          | 1 (0.2) [0.0, 0.9]   | 0 [0.0, 3.2]           | 1 (0.1) [0.0, 0.6]        | 0 [0.0, 2.7]            | 1 (0.1) [0.0, 0.5]   |
| Anal abscess                                                | 0 [0.0, 2.4]          | 1 (0.2) [0.0, 0.9]   | 0 [0.0, 3.2]           | 1 (0.1) [0.0, 0.6]        | 0 [0.0, 2.7]            | 1 (0.1) [0.0, 0.5]   |
| Appendicitis                                                | 0 [0.0, 2.4]          | 1 (0.2) [0.0, 0.9]   | 0 [0.0, 3.2]           | 1 (0.1) [0.0, 0.6]        | 0 [0.0, 2.7]            | 1 (0.1) [0.0, 0.5]   |
| Bacterial infection                                         | 0 [0.0, 2.4]          | 1 (0.2) [0.0, 0.9]   | 0 [0.0, 3.2]           | 1 (0.1) [0.0, 0.6]        | 0 [0.0, 2.7]            | 1 (0.1) [0.0, 0.5]   |
| Bacterial tracheitis                                        | 0 [0.0, 2.4]          | 1 (0.2) [0.0, 0.9]   | 0 [0.0, 3.2]           | 1 (0.1) [0.0, 0.6]        | 0 [0.0, 2.7]            | 1 (0.1) [0.0, 0.5]   |
| Cellulitis staphylococcal                                   | 0 [0.0, 2.4]          | 0 [0.0, 0.6]         | 0 [0.0, 3.2]           | 0 [0.0, 0.4]              | 1 (0.7) [0.0, 4.0]      | 1 (0.1) [0.0, 0.5]   |
| Chronic sinusitis                                           | 0 [0.0, 2.4]          | 1 (0.2) [0.0, 0.9]   | 0 [0.0, 3.2]           | 1 (0.1) [0.0, 0.6]        | 0 [0.0, 2.7]            | 1 (0.1) [0.0, 0.5]   |
| Diverticulitis                                              | 0 [0.0, 2.4]          | 1 (0.2) [0.0, 0.9]   | 0 [0.0, 3.2]           | 1 (0.1) [0.0, 0.6]        | 0 [0.0, 2.7]            | 1 (0.1) [0.0, 0.5]   |
| Epstein-Barr virus infection                                | 0 [0.0, 2.4]          | 0 [0.0, 0.6]         | 0 [0.0, 3.2]           | 0 (0) [0.0, 0.4]          | 1 (0.7) [0.0, 4.0]      | 1 (0.1) [0.0, 0.5]   |
| Erysipelas                                                  | 0 [0.0, 2.4]          | 0 [0.0, 0.6]         | 1 (0.9) [0.0, 4.9]     | 1 (0.1) [0.0, 0.6]        | 0 [0.0, 2.7]            | 1 (0.1) [0.0, 0.5]   |
| Eyelid infection                                            | 0 [0.0, 2.4]          | 0 [0.0, 0.6]         | 0 [0.0, 3.2]           | 0 (0) [0.0, 0.4]          | 1 (0.7) [0.0, 4.0]      | 1 (0.1) [0.0, 0.5]   |
| Furuncle                                                    | 0 [0.0, 2.4]          | 1 (0.2) [0.0, 0.9]   | 0 [0.0, 3.2]           | 1 (0.1) [0.0, 0.6]        | 0 [0.0, 2.7]            | 1 (0.1) [0.0, 0.5]   |
| Gastroenteritis rotavirus                                   | 0 [0.0, 2.4]          | 0 [0.0, 0.6]         | 0 [0.0, 3.2]           | 0 [0.0, 0.4]              | 1 (0.7) [0.0, 4.0]      | 1 (0.1) [0.0, 0.5]   |

| <b>SOC, Preferred term,<br/>n (IR/ 100 PY)<br/>(95% CI)</b> | <b>FCAS<br/>N= 42</b> | <b>MWS<br/>N=169</b> | <b>NOMID<br/>N= 32</b> | <b>All CAPS<br/>N=243</b> | <b>Other*<br/>N= 42</b> | <b>ALL<br/>N=285</b> |
|-------------------------------------------------------------|-----------------------|----------------------|------------------------|---------------------------|-------------------------|----------------------|
| Latent tuberculosis                                         | 0 [0.0, 2.4]          | 0 [0.0, 0.6]         | 0 [0.0, 3.2]           | 0 [0.0, 0.4]              | 1 (0.7) [0.0, 4.0]      | 1 (0.1) [0.0, 0.5]   |
| Localized infection                                         | 0 [0.0, 2.4]          | 0 [0.0, 0.6]         | 1 (0.9) [0.0, 4.9]     | 1 (0.1) [0.0, 0.6]        | 0 [0.0, 2.7]            | 1 (0.1) [0.0, 0.5]   |
| Lung infection                                              | 0 [0.0, 2.4]          | 1 (0.2) [0.0, 0.9]   | 0 [0.0, 3.2]           | 1 (0.1) [0.0, 0.6]        | 0 [0.0, 2.7]            | 1 (0.1) [0.0, 0.5]   |
| Mastitis                                                    | 1 (0.6) [0.0, 3.6]    | 0 [0.0, 0.6]         | 0 [0.0, 3.2]           | 1 (0.1) [0.0, 0.6]        | 0 [0.0, 2.7]            | 1 (0.1) [0.0, 0.5]   |
| Meningitis aseptic                                          | 0 [0.0, 2.4]          | 0 [0.0, 0.6]         | 1 (0.9) [0.0, 4.9]     | 1 (0.1) [0.0, 0.6]        | 0 [0.0, 2.7]            | 1 (0.1) [0.0, 0.5]   |
| Meningitis bacterial                                        | 0 [0.0, 2.4]          | 1 (0.2) [0.0, 0.9]   | 0 [0.0, 3.2]           | 1 (0.1) [0.0, 0.6]        | 0 [0.0, 2.7]            | 1 (0.1) [0.0, 0.5]   |
| Molluscum contagiosum                                       | 0 [0.0, 2.4]          | 1 (0.2) [0.0, 0.9]   | 0 [0.0, 3.2]           | 1 (0.1) [0.0, 0.6]        | 0 [0.0, 2.7]            | 1 (0.1) [0.0, 0.5]   |
| Otitis media                                                | 0 [0.0, 2.4]          | 1 (0.2) [0.0, 0.9]   | 0 [0.0, 3.2]           | 1 (0.1) [0.0, 0.6]        | 0 [0.0, 2.7]            | 1 (0.1) [0.0, 0.5]   |
| Parvovirus B19 infection                                    | 0 [0.0, 2.4]          | 0 [0.0, 0.6]         | 0 [0.0, 3.2]           | 0 [0.0, 0.4]              | 1 (0.7) [0.0, 4.0]      | 1 (0.1) [0.0, 0.5]   |
| Periorbital cellulitis                                      | 0 [0.0, 2.4]          | 1 (0.2) [0.0, 0.9]   | 0 [0.0, 3.2]           | 1 (0.1) [0.0, 0.6]        | 0 [0.0, 2.7]            | 1 (0.1) [0.0, 0.5]   |
| Pilonidal cyst                                              | 0 [0.0, 2.4]          | 0 [0.0, 0.6]         | 1 (0.9) [0.0, 4.9]     | 1 (0.1) [0.0, 0.6]        | 0 [0.0, 2.7]            | 1 (0.1) [0.0, 0.5]   |
| Postoperative wound infection                               | 0 [0.0, 2.4]          | 0 [0.0, 0.6]         | 0 [0.0, 3.2]           | 0 [0.0, 0.4]              | 1 (0.7) [0.0, 4.0]      | 1 (0.1) [0.0, 0.5]   |
| Pyelonephritis acute                                        | 0 [0.0, 2.4]          | 0 [0.0, 0.6]         | 0 [0.0, 3.2]           | 0 [0.0, 0.4]              | 1 (0.7) [0.0, 4.0]      | 1 (0.1) [0.0, 0.5]   |
| Rhinovirus infection                                        | 0 [0.0, 2.4]          | 1 (0.2) [0.0, 0.9]   | 0 [0.0, 3.2]           | 1 (0.1) [0.0, 0.6]        | 0 [0.0, 2.7]            | 1 (0.1) [0.0, 0.5]   |
| Scarlet fever                                               | 0 [0.0, 2.4]          | 0 [0.0, 0.6]         | 0 [0.0, 3.2]           | 0 [0.0, 0.4]              | 1 (0.7) [0.0, 4.0]      | 1 (0.1) [0.0, 0.5]   |
| Staphylococcal infection                                    | 0 [0.0, 2.4]          | 1 (0.2) [0.0, 0.9]   | 0 [0.0, 3.2]           | 1 (0.1) [0.0, 0.6]        | 0 [0.0, 2.7]            | 1 (0.1) [0.0, 0.5]   |

| <b>SOC, Preferred term,<br/>n (IR/ 100 PY)<br/>(95% CI)</b>         | <b>FCAS<br/>N= 42</b> | <b>MWS<br/>N=169</b> | <b>NOMID<br/>N= 32</b> | <b>All CAPS<br/>N=243</b> | <b>Other*<br/>N= 42</b> | <b>ALL<br/>N=285</b>  |
|---------------------------------------------------------------------|-----------------------|----------------------|------------------------|---------------------------|-------------------------|-----------------------|
| Subcutaneous abscess                                                | 0 [0.0, 2.4]          | 1 (0.2) [0.0, 0.9]   | 0 [0.0, 3.2]           | 1 (0.1) [0.0, 0.6]        | 0 [0.0, 2.7]            | 1 (0.1) [0.0, 0.5]    |
| Tinea cruris                                                        | 0 [0.0, 2.4]          | 0 [0.0, 0.6]         | 1 (0.9) [0.0, 4.9]     | 1 (0.1) [0.0, 0.6]        | 0 [0.0, 2.7]            | 1 (0.1) [0.0, 0.5]    |
| Tracheitis                                                          | 0 [0.0, 2.4]          | 0 [0.0, 0.6]         | 0 [0.0, 3.2]           | 0 [0.0, 0.4]              | 1 (0.7) [0.0, 4.0]      | 1 (0.1) [0.0, 0.5]    |
| Vaccination site cellulitis                                         | 0 [0.0, 2.4]          | 1 (0.2) [0.0, 0.9]   | 0 [0.0, 3.2]           | 1 (0.1) [0.0, 0.6]        | 0 [0.0, 2.7]            | 1 (0.1) [0.0, 0.5]    |
| Viral diarrhoea                                                     | 0 [0.0, 2.4]          | 0 [0.0, 0.6]         | 0 [0.0, 3.2]           | 0 [0.0, 0.4]              | 1 (0.7) [0.0, 4.0]      | 1 (0.1) [0.0, 0.5]    |
| Viral myositis                                                      | 0 [0.0, 2.4]          | 0 [0.0, 0.6]         | 0 [0.0, 3.2]           | 0 [0.0, 0.4]              | 1 (0.7) [0.0, 4.0]      | 1 (0.1) [0.0, 0.5]    |
| Wound infection                                                     | 0 [0.0, 2.4]          | 1 (0.2) [0.0, 0.9]   | 0 [0.0, 3.2]           | 1 (0.1) [0.0, 0.6]        | 0 [0.0, 2.7]            | 1 (0.1) [0.0, 0.5]    |
| <b>General disorders and<br/>administration site<br/>conditions</b> | 4 (2.6) [0.7, 6.6]    | 62 (9.6) [7.3, 12.3] | 10 (8.8) [4.2, 16.2]   | 76 (8.3) [6.5, 10.4]      | 20 (14.3) [8.7, 22.1]   | 96 (9.1) [ 7.4, 11.1] |
| Pyrexia                                                             | 2 (1.3) [0.2, 4.6]    | 8 (1.2) [0.5, 2.4]   | 2 (1.8) [0.2, 6.3]     | 12 (1.3) [0.7, 2.3]       | 12 (8.6) [4.4, 15.0]    | 24 (2.3) [1.5, 3.4]   |
| Fatigue                                                             | 1 (0.6) [0.0, 3.6]    | 15 (2.3) [1.3, 3.8]  | 5 (4.4) [1.4,10.3]     | 21 (2.3) [1.4, 3.5]       | 2 (1.4) [0.2, 5.2]      | 23 (2.2) [1.4, 3.3]   |
| Malaise                                                             | 0 [0.0, 2.4]          | 4 (0.6) [0.2, 1.6]   | 0 [0.0, 3.2]           | 4 (0.4) [0.1, 1.1]        | 2 (1.4) [0.2, 5.2]      | 6 (0.6) [0.2, 1.2]    |
| Vaccination site<br>inflammation                                    | 0 [0.0, 2.4]          | 5 (0.8) [0.3, 1.8]   | 0 [0.0, 3.2]           | 5 (0.5) [0.2, 1.3]        | 1 (0.7) [0.0, 4.0]      | 6 (0.6) [0.2, 1.2]    |
| Condition<br>aggravated                                             | 0 [0.0, 2.4]          | 2 (0.3) [0.0, 1.1]   | 1 (0.9) [0.0, 4.9]     | 3 (0.3) [0.1, 1.0]        | 0 [0.0, 2.7]            | 3 (0.3) [0.1, 0.8]    |
| Cyst                                                                | 0 [0.0, 2.4]          | 3 (0.5) [0.1, 1.4]   | 0 [0.0, 3.2]           | 3 (0.3) [0.1, 1.0]        | 0 [0.0, 2.7]            | 3 (0.3) [0.1, 0.8]    |
| Influenza like illness                                              | 1 (0.6) [0.0, 3.4]    | 2 (0.3) [0.0, 1.1]   | 0 [0.0, 3.2]           | 3 (0.3) [0.0, 1.0]        | 0 [0.0, 2.7]            | 3 (0.3) [0.1, 1.0]    |

| <b>SOC, Preferred term,<br/>n (IR/ 100 PY)<br/>(95% CI)</b> | <b>FCAS<br/>N= 42</b> | <b>MWS<br/>N=169</b> | <b>NOMID<br/>N= 32</b> | <b>All CAPS<br/>N=243</b> | <b>Other*<br/>N= 42</b> | <b>ALL<br/>N=285</b> |
|-------------------------------------------------------------|-----------------------|----------------------|------------------------|---------------------------|-------------------------|----------------------|
| Injection site pain                                         | 0 [0.0, 2.4]          | 2 (0.3) [0.0, 1.1]   | 0 [0.0, 3.2]           | 2 (0.2) [0.0, 0.8]        | 1 (0.7) [0.0, 4.0]      | 3 (0.3) [0.1, 0.8]   |
| Injection site reaction                                     | 0 [0.0, 2.4]          | 3 (0.5) [0.1, 1.4]   | 0 [0.0, 3.2]           | 3 (0.3) [0.1, 1.0]        | 0 [0.0, 2.7]            | 3 (0.3) [0.1, 0.8]   |
| Vaccination site reaction                                   | 0 [0.0, 2.4]          | 2 (0.3) [0.0, 1.1]   | 1 (0.9) [0.0, 4.9]     | 3 (0.3) [0.1, 1.0]        | 0 [0.0, 2.7]            | 3 (0.3) [0.1, 0.8]   |
| Drug ineffective                                            | 0 [0.0, 2.4]          | 2 (0.3) [0.0, 1.1]   | 0 [0.0, 3.2]           | 2 (0.2) [0.0, 0.8]        | 0 [0.0, 2.7]            | 2 (0.2) [0.0, 0.7]   |
| Vaccination site erythema                                   | 0 [0.0, 2.4]          | 2 (0.3) [0.0, 1.1]   | 0 [0.0, 3.2]           | 2 (0.2) [0.0, 0.8]        | 0 [0.0, 2.7]            | 2 (1.0) [0.0, 0.7]   |
| Adverse drug reaction                                       | 0 [0.0, 2.4]          | 1 (0.2) [0.0, 0.9]   | 0 [0.0, 3.2]           | 1 (0.1) [0.0, 0.6]        | 0 [0.0, 2.7]            | 1 (1.0) [0.0, 0.5]   |
| Asthenia                                                    | 0 [0.0, 2.4]          | 1 (0.2) [0.0, 0.9]   | 0 [0.0, 3.2]           | 1 (0.1) [0.0, 0.6]        | 0 [0.0, 2.7]            | 1 (0.1) [0.0, 0.5]   |
| Chest pain                                                  | 0 [0.0, 2.4]          | 1 (0.2) [0.0, 0.9]   | 0 [0.0, 3.2]           | 1 (0.1) [0.0, 0.6]        | 0 [0.0, 2.7]            | 1 (0.1) [0.0, 0.5]   |
| Feeling cold                                                | 0 [0.0, 2.4]          | 1 (0.2) [0.0, 0.9]   | 0 [0.0, 3.2]           | 1 (0.1) [0.0, 0.6]        | 0 [0.0, 2.7]            | 1 (0.1) [0.0, 0.5]   |
| Hunger                                                      | 0 [0.0, 2.4]          | 1 (0.2) [0.0, 0.9]   | 0 [0.0, 3.2]           | 1 (0.1) [0.0, 0.6]        | 0 [0.0, 2.7]            | 1 (0.1) [0.0, 0.5]   |
| Immediate post-injection reaction                           | 0 [0.0, 2.4]          | 1 (0.2) [0.0, 0.9]   | 0 (0) [0.0, 3.2]       | 1 (0.1) [0.0, 0.6]        | 0 (0) [0.0, 2.7]        | 1 (0.1) [0.0, 0.5]   |
| Impaired healing                                            | 0 [0.0, 2.4]          | 0 [0.0, 0.6]         | 1 (0.9) [0.0, 4.9]     | 1 (0.1) [0.0, 0.6]        | 0 (0) [0.0, 2.7]        | 1 (0.1) [0.0, 0.5]   |
| Injection site erythema                                     | 0 [0.0, 2.4]          | 1 (0.2) [0.0, 0.9]   | 0 [0.0, 3.2]           | 1 (0.1) [0.0, 0.6]        | 0 [0.0, 2.7]            | 1 (0.1) [0.0, 0.5]   |
| Injection site hematoma                                     | 0 [0.0, 2.4]          | 1 (0.2) [0.0, 0.9]   | 0 [0.0, 3.2]           | 1 (0.1) [0.0, 0.6]        | 0 [0.0, 2.7]            | 1 (0.1) [0.0, 0.5]   |
| Injection site irritation                                   | 0 [0.0, 2.4]          | 1 (0.2) [0.0, 0.9]   | 0 [0.0, 3.2]           | 1 (0.1) [0.0, 0.6]        | 0 [0.0, 2.7]            | 1 (0.1) [0.0, 0.5]   |

| SOC, Preferred term, n (IR/ 100 PY) (95% CI) | FCAS N= 42          | MWS N=169            | NOMID N= 32         | All CAPS N=243      | Other* N= 42           | ALL N=285            |
|----------------------------------------------|---------------------|----------------------|---------------------|---------------------|------------------------|----------------------|
| Localized edema                              | 0 [0.0, 2.4]        | 0 [0.0, 0.6]         | 0 [0.0, 3.2]        | 0 [0.0, 0.4]        | 1 (0.7) [0.0, 4.0]     | 1 (0.1) [0.0, 0.5]   |
| Nodule                                       | 0 [0.0, 2.4]        | 0 [0.0, 0.6]         | 0 [0.0, 3.2]        | 0 [0.0, 0.4]        | 1 (0.7) [0.0, 4.0]     | 1 (0.1) [0.0, 0.5]   |
| Non-cardiac chest pain                       | 0 [0.0, 2.4]        | 1 (0.2) [0.0, 0.9]   | 0 [0.0, 3.2]        | 1 (0.1) [0.0, 0.6]  | 0 [0.0, 2.7]           | 1 (0.1) [0.0, 0.5]   |
| Peripheral swelling                          | 0 [0.0, 2.4]        | 1 (0.2) [0.0, 0.9]   | 0 [0.0, 3.2]        | 1 (0.1) [0.0, 0.6]  | 0 [0.0, 2.7]           | 1 (0.1) [0.0, 0.5]   |
| Therapeutic product ineffective              | 0 [0.0, 2.4]        | 1 (0.2) [0.0, 0.9]   | 0 [0.0, 3.2]        | 1 (0.1) [0.0, 0.6]  | 0 [0.0, 2.7]           | 1 (0.1) [0.0, 0.5]   |
| <b>Gastrointestinal disorders</b>            | 8 (5.1) [2.2, 10.1] | 51 (7.9) [5.9, 10.3] | 6 (5.3) [1.9, 11.5] | 65 (7.1) [5.5, 9.0] | 24 (17.2) [11.0, 25.6] | 89 (8.4) [6.8, 10.3] |
| Diarrhea                                     | 1 (0.6) [0.0, 3.6]  | 9 (1.4) [0.6, 2.6]   | 3 (2.6) [0.5, 7.7]  | 13 (1.4) [0.8, 2.4] | 3 (2.1) [0.4, 6.3]     | 16 (1.5) [0.9, 2.5]  |
| Abdominal pain                               | 0 [0.0, 2.4]        | 3 (0.5) [0.1, 1.4]   | 3 (2.6) [0.5, 7.7]  | 6 (0.7) [0.24, 1.4] | 5 (3.6) [1.2, 8.3]     | 11 (1.0) [0.5, 1.9]  |
| Abdominal pain upper                         | 0 [0.0, 2.4]        | 6 (0.9) [0.3, 2.0]   | 0 [0.0, 3.2]        | 6 (0.7) [0.2, 1.4]  | 1 (0.7) [0.0, 4.0]     | 7 (0.7) [0.3, 1.4]   |
| Vomiting                                     | 0 [0.0, 2.4]        | 3 (0.5) [0.1, 1.4]   | 0 [0.0, 3.2]        | 3 (0.3) [0.1, 1.0]  | 4 (2.9) [0.8, 7.3]     | 7 (0.7) [0.3, 1.4]   |
| Constipation                                 | 1 (0.6) [0.0, 3.6]  | 4 (0.6) [0.2, 1.6]   | 0 [0.0, 3.2]        | 5 (0.5) [0.2, 1.3]  | 1 (0.7) [0.0, 4.0]     | 6 (0.6) [0.2, 1.2]   |
| Pancreatitis                                 | 0 [0.0, 2.4]        | 6 (0.9) [0.3, 2.0]   | 0 [0.0, 3.2]        | 6 (0.7) [0.2, 1.4]  | 0 [0.0, 2.7]           | 6 (0.6) [0.2, 1.2]   |
| Anal fissure                                 | 0 [0.0, 2.4]        | 2 (0.3) [0.0, 1.1]   | 0 [0.0, 3.2]        | 2 (0.2) [0.0, 0.8]  | 2 (1.4) [0.2, 5.2]     | 4 (0.4) [0.1, 1.0]   |
| Aphthous ulcer                               | 2 (1.3) [0.2, 4.6]  | 2 (0.3) [0.0, 1.1]   | 0 [0.0, 3.2]        | 4 (0.4) [0.1, 1.1]  | 0 [0.0, 2.7]           | 4 (0.4) [0.1, 1.0]   |
| Gastroesophageal                             | 1 (0.6) [0.0, 3.4]  | 3 (0.5) [0.1, 1.4]   | 0 [0.0, 3.2]        | 4 (0.4) [0.1, 1.1]  | 0 [0.0, 2.7]           | 4 (0.4) [0.1, 1.0]   |



| <b>SOC, Preferred term,<br/>n (IR/ 100 PY)<br/>(95% CI)</b> | <b>FCAS<br/>N= 42</b> | <b>MWS<br/>N=169</b> | <b>NOMID<br/>N= 32</b> | <b>All CAPS<br/>N=243</b> | <b>Other*<br/>N= 42</b> | <b>ALL<br/>N=285</b> |
|-------------------------------------------------------------|-----------------------|----------------------|------------------------|---------------------------|-------------------------|----------------------|
| reflux disease                                              |                       |                      |                        |                           |                         |                      |
| Gastritis                                                   | 0 [0.0, 2.4]          | 1 (0.2) [0.0, 0.9]   | 0 [0.0, 3.2]           | 1 (0.1) [0.0, 0.6]        | 2 (1.4) [0.2, 5.2]      | 3 (0.3) [0.1, 1.0]   |
| Dental necrosis                                             | 0 [0.0, 2.4]          | 2 (0.3) [0.0, 1.1]   | 0 [0.0, 3.2]           | 2 (0.2) [0.0, 0.8]        | 0 [0.0, 2.7]            | 2 (0.2) [0.0, 0.7]   |
| Gingival pain                                               | 1 (0.6) [0.0, 3.6]    | 1 (0.2) [0.0, 0.9]   | 0 [0.0, 3.2]           | 2 (0.2) [0.0, 0.8]        | 0 [0.0, 2.7]            | 2 (0.2) [0.0, 0.7]   |
| Mouth ulceration                                            | 0 [0.0, 2.4]          | 1 (0.2) [0.0, 0.9]   | 0 [0.0, 3.2]           | 1 (0.1) [0.0, 0.6]        | 1 (0.7) [0.0, 4.0]      | 2 (0.2) [0.0, 0.7]   |
| Abdominal hernia                                            | 1 (0.6) [0.0, 3.6]    | 0 [0.0, 0.6]         | 0 [0.0, 3.2]           | 1 (0.1) [0.0, 0.6]        | 0 [0.0, 2.7]            | 1 (0.1) [0.0, 0.5]   |
| Abdominal pain lower                                        | 0 [0.0, 2.4]          | 0 [0.0, 0.6]         | 0 [0.0, 3.2]           | 0 [0.0, 0.4]              | 1 (0.7) [0.0, 4.0]      | 1 (0.1) [0.0, 0.5]   |
| Dental caries                                               | 1 (0.6) [0.0, 3.6]    | 0 [0.0, 0.6]         | 0 [0.0, 3.2]           | 1 (0.1) [0.0, 0.6]        | 0 [0.0, 2.7]            | 1 (0.1) [0.0, 0.5]   |
| Dyspepsia                                                   | 0 [0.0, 2.4]          | 1 (0.2) [0.0, 0.9]   | 0 [0.0, 3.2]           | 1 (0.1) [0.0, 0.6]        | 0 [0.0, 2.7]            | 1 (0.1) [0.0, 0.5]   |
| Enterocolitis                                               | 0 [0.0, 2.4]          | 0 [0.0, 0.6]         | 0 [0.0, 3.2]           | 0 [0.0, 0.4]              | 1 (0.7) [0.0, 4.0]      | 1 (0.1) [0.0, 0.5]   |
| Flatulence                                                  | 0 [0.0, 2.4]          | 1 (0.2) [0.0, 0.9]   | 0 [0.0, 3.2]           | 1 [0.0, 0.6]              | 0 [0.0, 2.7]            | 1 (0.1) [0.0, 0.5]   |
| Gastrointestinal toxicity                                   | 0 [0.0, 2.4]          | 0 (0) [0.0, 0.6]     | 0 [0.0, 3.2]           | 0 [0.0, 0.4]              | 1 (0.7) [0.0, 4.0]      | 1 (0.1) [0.0, 0.5]   |
| Haemorrhoids                                                | 0 [0.0, 2.4]          | 1 (0.2) [0.0, 0.9]   | 0 [0.0, 3.2]           | 1 (0.1) [0.0, 0.6]        | 0 [0.0, 2.7]            | 1 (0.1) [0.0, 0.5]   |
| Inguinal hernia                                             | 0 [0.0, 2.4]          | 0 [0.0, 0.6]         | 0 [0.0, 3.2]           | 0 [0.0, 0.4]              | 1 (0.7) [0.0, 4.0]      | 1 (0.1) [0.0, 0.5]   |
| Large intestine polyp                                       | 0 [0.0, 2.4]          | 1 (0.2) [0.0, 0.9]   | 0 [0.0, 3.2]           | 1 (0.1) [0.0, 0.6]        | 0 [0.0, 2.7]            | 1 (0.1) [0.0, 0.5]   |
| Lip blister                                                 | 0 [0.0, 2.4]          | 1 (0.2) [0.0, 0.9]   | 0 [0.0, 3.2]           | 1 (0.1) [0.0, 0.6]        | 0 [0.0, 2.7]            | 1 (0.1) [0.0, 0.5]   |

| <b>SOC, Preferred term,<br/>n (IR/ 100 PY)<br/>(95% CI)</b>    | <b>FCAS<br/>N= 42</b> | <b>MWS<br/>N=169</b> | <b>NOMID<br/>N= 32</b> | <b>All CAPS<br/>N=243</b> | <b>Other*<br/>N= 42</b> | <b>ALL<br/>N=285</b> |
|----------------------------------------------------------------|-----------------------|----------------------|------------------------|---------------------------|-------------------------|----------------------|
| Nausea                                                         | 0 [0.0, 2.4]          | 1 (0.2) [0.0, 0.9]   | 0 [0.0, 3.2]           | 1 (0.1) [0.0, 0.6]        | 0 [0.0, 2.7]            | 1 (0.1) [0.0, 0.5]   |
| Noninfective gingivitis                                        | 0 [0.0, 2.4]          | 1 (0.2) [0.0, 0.9]   | 0 [0.0, 3.2]           | 1 (0.1) [0.0, 0.6]        | 0 [0.0, 2.7]            | 1 (0.1) [0.0, 0.5]   |
| Odynophagia                                                    | 0 [0.0, 2.4]          | 0 (0) [0.0, 0.6]     | 0 [0.0, 3.2]           | 0 [0.0, 0.4]              | 1 (0.7) [0.0, 4.0]      | 1 (0.1) [0.0, 0.5]   |
| Umbilical hernia                                               | 0 [0.0, 2.4]          | 1 (0.2) [0.0, 0.9]   | 0 [0.0, 3.2]           | 1 (0.1) [0.0, 0.6]        | 0 [0.0, 2.7]            | 1 (0.1) [0.0, 0.5]   |
| <b>Musculoskeletal and<br/>connective tissue<br/>disorders</b> | 8 (5.1) [2.2, 10.1]   | 35 (5.4) [3.8, 7.5]  | 4 (3.5) [1.0, 9.0]     | 47 (5.1) [3.8, 6.8]       | 21 (15.0) [9.3, 23.0]   | 68 (6.4) [5.0, 8.2]  |
| Arthralgia                                                     | 2(1.3) [0.2, 4.6]     | 6 (0.9) [0.3, 2.0]   | 0 [0.0, 3.2]           | 8 (0.9) [0.4, 1.7]        | 3 (2.1) [0.4, 6.3]      | 11 (1.0) [0.5, 1.9]  |
| Back pain                                                      | 1 (0.6) [0.0, 3.6]    | 5 (0.8) [0.3, 1.8]   | 0 [0.0, 3.2]           | 6 (0.7) [0.2, 1.4]        | 2 (1.4) [0.2, 5.2]      | 8 (0.8) [0.3, 1.5]   |
| Pain in extremity                                              | 1(0.6) [0.0, 3.6]     | 3 (0.5) [0.1, 1.4]   | 0 [0.0, 3.2]           | 4 (0.4) [0.1, 1.2]        | 3 (2.2) [0.4, 6.3]      | 7 (0.7) [0.3, 1.4]   |
| Synovitis                                                      | 0 [0.0, 2.4]          | 4 (0.6) [0.2, 1.6]   | 0 [0.0, 3.2]           | 4 (0.4) [0.1, 1.1]        | 0 [0.0, 2.7]            | 4 (0.4) [0.1, 1.0]   |
| Muscle spasms                                                  | 0 [0.0, 2.4]          | 3 (0.5) [0.1, 1.4]   | 0 [0.0, 3.2]           | 3 (0.3) [0.1, 1.0]        | 0 [0.0, 2.7]            | 3 (0.3) [0.1, 0.8]   |
| Musculoskeletal pain                                           | 1 (0.6) [0.0, 3.6]    | 1(0.2) [0.0, 0.9]    | 0 [0.0, 3.2]           | 2 (0.2) [0.0, 0.8]        | 1 (0.7) [0.0, 4.0]      | 3 (0.3) [0.1, 0.8]   |
| Neck pain                                                      | 1 (0.6) [0.0, 3.6]    | 1(0.2) [0.0, 0.9]    | 0 [0.0, 3.2]           | 2 (0.2) [0.0, 0.8]        | 1 (0.7) [0.0, 4.0]      | 3 (0.3) [0.1, 0.8]   |
| Coccydynia                                                     | 1 (0.6) [0.0, 3.6]    | 0 [0.0, 0.6]         | 0 [0.0, 3.2]           | 1 (0.1) [0.0, 0.6]        | 1 (0.7) [0.0, 4.0]      | 2 (0.2) [0.0, 0.7]   |
| Knee deformity                                                 | 0 [0.0, 2.4]          | 0 [0.0, 0.6]         | 2 (1.8) [0.2, 6.3]     | 2 (0.2) [0.0, 0.8]        | 0 [0.0, 2.7]            | 2 (0.2) [0.0, 0.7]   |
| Myalgia                                                        | 0 [0.0, 2.4]          | 1 (0.2) [0.0, 0.9]   | 0 [0.0, 3.2]           | 1 (0.2) [0.0, 0.6]        | 1 (0.7) [0.0, 4.0]      | 2 (0.2) [0.0, 0.7]   |

| <b>SOC, Preferred term,<br/>n (IR/ 100 PY)<br/>(95% CI)</b> | <b>FCAS<br/>N= 42</b> | <b>MWS<br/>N=169</b> | <b>NOMID<br/>N= 32</b> | <b>All CAPS<br/>N=243</b> | <b>Other*<br/>N= 42</b> | <b>ALL<br/>N=285</b> |
|-------------------------------------------------------------|-----------------------|----------------------|------------------------|---------------------------|-------------------------|----------------------|
| Plantar fasciitis                                           | 0 [0.0, 2.4]          | 2 (0.3) [0.0, 1.1]   | 0 [0.0, 3.2]           | 2 (0.2) [0.0, 0.8]        | 0 [0.0, 2.7]            | 2 (0.2) [0.0, 0.7]   |
| Synovial cyst                                               | 0 [0.0, 2.4]          | 1 (0.2) [0.0, 0.9]   | 0 [0.0, 3.2]           | 1 (0.1) [0.0, 0.6]        | 1 (0.7) [0.0, 4.0]      | 2 (0.2) [0.0, 0.7]   |
| Tendonitis                                                  | 1 (0.6) [0.0, 3.6]    | 0 [0.0, 0.6]         | 0 [0.0, 3.2]           | 1 (0.1) [0.0, 0.6]        | 1 (0.7) [0.0, 4.0]      | 2 (0.2) [0.0, 0.7]   |
| Acquired claw toe                                           | 0 [0.0, 2.4]          | 0 [0.0, 0.6]         | 0 [0.0, 3.2]           | 0 [0.0, 0.4]              | 1 (0.7) [0.0, 4.0]      | 1 (0.1) [0.0, 0.5]   |
| Arthropathy                                                 | 0 [0.0, 2.4]          | 0 [0.0, 0.6]         | 0 [0.0, 3.2]           | 0 [0.0, 0.4]              | 1 (0.7) [0.0, 4.0]      | 1 (0.1) [0.0, 0.5]   |
| Bursitis                                                    | 0 [0.0, 2.4]          | 0 [0.0, 0.6]         | 0 [0.0, 3.2]           | 0 [0.0, 0.4]              | 1 (0.7) [0.0, 4.0]      | 1 (0.1) [0.0, 0.5]   |
| Chondropathy                                                | 0 [0.0, 2.4]          | 1 (0.2) [0.0, 0.9]   | 0 (0) [0.0, 3.2]       | 1 (0.1) [0.0, 0.6]        | 0 [0.0, 2.7]            | 1 (0.1) [0.0, 0.5]   |
| Costochondritis                                             | 0 [0.0, 2.4]          | 1 (0.2) [0.0, 0.9]   | 0 (0) [0.0, 3.2]       | 1 (0.1) [0.0, 0.6]        | 0 [0.0, 2.7]            | 1 (0.1) [0.0, 0.5]   |
| Fibromyalgia                                                | 0 [0.0, 2.4]          | 1 (0.2) [0.0, 0.9]   | 0 (0) [0.0, 3.2]       | 1 (0.1) [0.0, 0.6]        | 0 [0.0, 2.7]            | 1 (0.1) [0.0, 0.5]   |
| Interventional disc protrusion                              | 0 [0.0, 2.4]          | 1 (0.2) [0.0, 0.9]   | 0 [0.0, 3.2]           | 1 (0.1) [0.0, 0.6]        | 0 [0.0, 2.7]            | 1 (0.1) [0.0, 0.5]   |
| Joint swelling                                              | 0 [0.0, 2.4]          | 0 [0.0, 0.6]         | 1 (0.9) [0.0, 4.9]     | 1 (0.1) [0.0, 0.6]        | 0 [0.0, 2.7]            | 1 (0.1) [0.0, 0.5]   |
| Joint warmth                                                | 0 [0.0, 2.4]          | 0 [0.0, 0.6]         | 1 (0.9) [0.0, 4.9]     | 1 (0.1) [0.0, 0.6]        | 0 [0.0, 2.7]            | 1 (0.1) [0.0, 0.5]   |
| Limb discomfort                                             | 0 [0.0, 2.4]          | 0 [0.0, 0.6]         | 0 [0.0, 3.2]           | 0 [0.0, 0.4]              | 1 (0.7) [0.0, 4.0]      | 1 (0.1) [0.0, 0.5]   |
| Lumbar spinal stenosis                                      | 0 [0.0, 2.4]          | 1 (0.2) [0.0, 0.9]   | 0 [0.0, 3.2]           | 1 (0.1) [0.0, 0.6]        | 0 [0.0, 2.7]            | 1 (0.1) [0.0, 0.5]   |
| Musculoskeletal chest pain                                  | 0 [0.0, 2.4]          | 1 (0.2) [0.0, 0.9]   | 0 [0.0, 3.2]           | 1 (0.1) [0.0, 0.6]        | 0 [0.0, 2.7]            | 1 (0.1) [0.0, 0.5]   |

| SOC, Preferred term, n (IR/ 100 PY) (95% CI) | FCAS N= 42         | MWS N=169           | NOMID N= 32           | All CAPS N=243      | Other* N= 42         | ALL N=285           |
|----------------------------------------------|--------------------|---------------------|-----------------------|---------------------|----------------------|---------------------|
| Musculoskeletal stiffness                    | 0 [0.0, 2.4]       | 0 [0.0, 0.6]        | 0 [0.0, 3.2]          | 0 [0.0, 0.4]        | 1 (0.7) [0.0, 4.0]   | 1 (0.1) [0.0, 0.5]  |
| Osteoporosis                                 | 0 [0.0, 2.4]       | 0 [0.0, 0.6]        | 0 [0.0, 3.2]          | 0 [0.0, 0.4]        | 1 (0.7) [0.0, 4.0]   | 1 (0.1) [0.0, 0.5]  |
| Sacroiliitis                                 | 0 [0.0, 2.4]       | 1 (0.2) [0.0, 0.9]  | 0 [0.0, 3.2]          | 1 (0.1) [0.0, 0.6]  | 0 [0.0, 2.7]         | 1 (0.1) [0.0, 0.5]  |
| Scoliosis                                    | 0 [0.0, 2.4]       | 0 [0.0, 0.6]        | 0 [0.0, 3.2]          | 0 [0.0, 0.4]        | 1 (0.7) [0.0, 4.0]   | 1 (0.1) [0.0, 0.5]  |
| Tendon pain                                  | 0 [0.0, 2.4]       | 1 (0.2) [0.0, 0.9]  | 0 [0.0, 3.2]          | 1 (0.1) [0.0, 0.6]  | 0 [0.0, 2.7]         | 1 (0.1) [0.0, 0.5]  |
| <b>Nervous system disorders</b>              | 5 (3.2) [1.0, 7.5] | 33 (5.1) [3.5, 7.1] | 17 (15.0) [8.7, 23.9] | 55 (6.0) [4.5, 7.8] | 11 (7.9) [3.9, 14.1] | 66 (6.2) [4.8, 7.9] |
| Headache                                     | 2 (1.3) [0.2, 4.6] | 12 (1.9) [1.0, 3.2] | 10 ( 8.8) [4.2,16.2]  | 24 (2.6) [1.7, 3.9] | 7 (5.0) [2.0,10.3]   | 31 (2.9) [2.0, 4.2] |
| Dizziness                                    | 1(0.6) [0.0, 3.6]  | 4 (0.6) [0.2, 1.6]  | 1 ( 0.9) [0.0, 4.9]   | 6 (0.7) [0.2, 1.4]  | 1 (0.7) [0.0, 4.0]   | 7 (0.7) [0.3, 1.4]  |
| Syncope                                      | 0 [0.0, 2.4]       | 3 (0.5) [0.1, 1.4]  | 2 (1.8) [0.2, 6.4]    | 5 (0.5) [0.2, 1.3]  | 0 [0.0, 2.7]         | 5 (0.5) [0.2, 1.1]  |
| Intracranial pressure increased              | 0 [0.0, 2.4]       | 0 [0.0, 0.6]        | 2 (1.8) [0.2, 6.4]    | 2 (0.2) [0.0, 0.8]  | 1 (0.7) [0.0, 4.0]   | 3 (0.3) [0.1, 0.8]  |
| Paraesthesia                                 | 0 [0.0, 2.4]       | 3 (0.5) [0.1, 1.4]  | 0 [0.0, 3.2]          | 3 (0.3) [0.1, 1.0]  | 0 [0.0, 2.7]         | 3 (0.3) [0.1, 0.8]  |
| Migraine                                     | 1 (0.6) [0.0, 3.6] | 1 (0.2) [0.0, 0.9]  | 0 [0.0, 3.2]          | 2 (0.2) [0.0, 0.8]  | 0 [0.0, 2.7]         | 2 (0.2) [0.0, 0.7]  |
| Sciatica                                     | 0 [0.0, 2.4]       | 2 (0.3) [0.0, 1.1]  | 0 [0.0, 3.2]          | 2 (0.2) [0.0, 0.8]  | 0 [0.0, 2.7]         | 2 (0.2) [0.0, 0.7]  |
| Amnesia                                      | 0 [0.0, 2.4]       | 0 [0.0, 0.6]        | 0 [0.0, 3.2]          | 0 [0.0, 0.4]        | 1 (0.7) [0.0, 4.0]   | 1 (0.1) [0.0, 0.5]  |
| Brain mass                                   | 0 [0.0, 2.4]       | 1 (0.2) [0.0, 0.9]  | 0 [0.0, 3.2]          | 1 (0.1) [0.0, 0.6]  | 0 [0.0, 2.7]         | 1 (0.1) [0.0, 0.5]  |

| SOC, Preferred term, n (IR/ 100 PY) (95% CI)           | FCAS N= 42         | MWS N=169           | NOMID N= 32        | All CAPS N=243      | Other* N= 42          | ALL N=285           |
|--------------------------------------------------------|--------------------|---------------------|--------------------|---------------------|-----------------------|---------------------|
| Carpal tunnel syndrome                                 | 0 [0.0, 2.4]       | 0 [0.0, 0.6]        | 1 (0.8) [0.0, 4.9] | 1 (0.1) [0.0, 0.6]  | 0 [0.0, 2.7]          | 1 (0.1) [0.0, 0.5]  |
| Cerebral infarction                                    | 1 (0.6) [0.0, 3.6] | 0 [0.0, 0.6]        | 0 [0.0, 3.2]       | 1 (0.1) [0.0, 0.6]  | 0 [0.0, 2.7]          | 1 (0.1) [0.0, 0.5]  |
| Demyelination                                          | 0 [0.0, 2.4]       | 1 (0.2) [0.0, 0.9]  | 0 [0.0, 3.2]       | 1 (0.1) [0.0, 0.6]  | 0 [0.0, 2.7]          | 1 (0.1) [0.0, 0.5]  |
| Epilepsy                                               | 0 [0.0, 2.4]       | 0 [0.0, 0.6]        | 1 (0.9) [0.0, 4.9] | 1 (0.1) [0.0, 0.6]  | 0 [0.0, 2.7]          | 1 (0.1) [0.0, 0.5]  |
| Hypoaesthesia                                          | 0 [0.0, 2.4]       | 1 (0.2) [0.0, 0.9]  | 0 [0.0, 3.2]       | 1 (0.1) [0.0, 0.6]  | 0 [0.0, 2.7]          | 1 (0.1) [0.0, 0.5]  |
| Nervous system disorder                                | 0 [0.0, 2.4]       | 1 (0.2) [0.0, 0.9]  | 0 [0.0, 3.2]       | 1 (0.1) [0.0, 0.6]  | 0 [0.0, 2.7]          | 1 (0.1) [0.0, 0.53] |
| Psychomotor hyperactivity                              | 0 [0.0, 2.4]       | 1 (0.2) [0.0, 0.9]  | 0 [0.0, 3.2]       | 1 (0.1) [0.0, 0.6]  | 0 [0.0, 2.7]          | 1 (0.1) [0.0, 0.5]  |
| Seizure                                                | 0 [0.0, 2.4]       | 1 (0.2) [0.0, 0.9]  | 0 [0.0, 3.2]       | 1 (0.1) [0.0, 0.6]  | 0 [0.0, 2.7]          | 1 (0.1) [0.0, 0.5]  |
| Sensory loss                                           | 0 [0.0, 2.4]       | 1 (0.2) [0.0, 0.9]  | 0 [0.0, 3.2]       | 1 (0.1) [0.0, 0.6]  | 0 [0.0, 2.7]          | 1 (0.1) [0.0, 0.5]  |
| Facial nerve paralysis                                 | 0 [0.0, 2.4]       | 1 (0.2) [0.0, 0.9]  | 0 [0.0, 3.2]       | 1 (0.1) [0.0, 0.6]  | 0 [0.0, 2.7]          | 1 (0.1) [0.0, 0.5]  |
| Visual field defect                                    | 0 [0.0, 2.4]       | 0 [0.0, 0.6]        | 0 [0.0, 3.2]       | 0 [0.0, 0.4]        | 1 (0.7) [0.0, 4.0]    | 1 (0.1) [0.0, 0.5]  |
| <b>Respiratory, thoracic and mediastinal disorders</b> | 3 (1.9) [0.4, 5.6] | 32 (4.9) [3.4, 7.0] | 2 (1.8) [0.2, 6.3] | 37 (4.0) [2.8, 5.6] | 17 (12.2) [7.1, 19.5] | 54 (5.1) [3.8, 6.7] |
| Cough                                                  | 1 (0.6) [0.0, 3.6] | 7 (1.1) [0.4, 2.2]  | 1 (0.9) [0.0, 4.9] | 8 (0.9) [0.5, 1.9]  | 7 (5.0) [2.0, 10.3]   | 16 (1.5) [0.9, 2.5] |
| Oropharyngeal pain                                     | 2 (1.3) [0.2, 4.6] | 5 (0.8) [0.3, 1.8]  | 1 (0.9) [0.0, 4.9] | 8 (0.9) [0.4, 1.7]  | 4 (2.9) [0.8, 7.3]    | 12 (1.1) [0.6, 2.0] |

| <b>SOC, Preferred term,<br/>n (IR/ 100 PY)<br/>(95% CI)</b> | <b>FCAS<br/>N= 42</b> | <b>MWS<br/>N=169</b> | <b>NOMID<br/>N= 32</b> | <b>All CAPS<br/>N=243</b> | <b>Other*<br/>N= 42</b> | <b>ALL<br/>N=285</b> |
|-------------------------------------------------------------|-----------------------|----------------------|------------------------|---------------------------|-------------------------|----------------------|
| Dyspnea                                                     | 0 [0.0, 2.4]          | 4 (0.6) [0.2, 1.6]   | 0 [0.0, 3.2]           | 4 (0.4) [0.1, 1.1]        | 2 (1.4) [0.2, 5.2]      | 6 (0.6) [0.2, 1.2]   |
| Asthma                                                      | 0 [0.0, 2.4]          | 4 (0.6) [0.2, 1.6]   | 0 [0.0, 3.2]           | 4 (0.4) [0.1, 1.1]        | 1 (0.7) [0.0, 4.0]      | 5 (0.5) [0.2, 1.1]   |
| Rhinitis allergic                                           | 0 [0.0, 2.4]          | 3 (0.5) [0.1, 1.4]   | 0 [0.0, 3.2]           | 3 (0.3) [0.1, 1.0]        | 0 [0.0, 2.7]            | 3 (0.3) [0.1, 0.9]   |
| Sleep apnoea syndrome                                       | 0 [0.0, 2.4]          | 2 (0.3) [0.0, 1.1]   | 0 [0.0, 3.2]           | 2 (0.2) [0.0, 0.8]        | 0 [0.0, 2.7]            | 2 (0.2) [0.0, 0.7]   |
| Acute respiratory distress syndrome                         | 0 [0.0, 2.4]          | 0 [0.0, 0.6]         | 0 [0.0, 3.2]           | 0 [0.0, 0.4]              | 1 (0.7) [0.0, 4.0]      | 1 (0.1) [0.0, 0.5]   |
| Adenoidal hypertrophy                                       | 0 [0.0, 2.4]          | 1 (0.2) [0.0, 0.9]   | 0 [0.0, 3.2]           | 1 (0.1) [0.0, 0.6]        | 0 [0.0, 2.7]            | 1 (0.1) [0.0, 0.5]   |
| Bronchial disorder                                          | 0 [0.0, 2.4]          | 1 (0.2) [0.0, 0.9]   | 0 [0.0, 3.2]           | 1 (0.1) [0.0, 0.6]        | 0 [0.0, 2.7]            | 1 (0.1) [0.0, 0.5]   |
| Bronchitis chronic                                          | 0 [0.0, 2.4]          | 1 (0.2) [0.0, 0.9]   | 0 [0.0, 3.2]           | 1 (0.1) [0.0, 0.6]        | 0 [0.0, 2.7]            | 1 (0.1) [0.0, 0.5]   |
| Dysphonia                                                   | 0 [0.0, 2.4]          | 1 (0.2) [0.0, 0.9]   | 0 [0.0, 3.2]           | 1 (0.1) [0.0, 0.6]        | 0 [0.0, 2.7]            | 1 (0.1) [0.0, 0.5]   |
| Nasal discharge discolouration                              | 0 [0.0, 2.4]          | 0 [0.0, 0.6]         | 0 [0.0, 3.2]           | 0 [0.0, 0.4]              | 1 (0.7) [0.0, 4.0]      | 1 (0.1) [0.0, 0.5]   |
| Nasal turbinate hypertrophy                                 | 0 [0.0, 2.4]          | 1 (0.2) [0.0, 0.9]   | 0 [0.0, 3.2]           | 1 (0.1) [0.0, 0.6]        | 0 [0.0, 2.7]            | 1 (0.1) [0.0, 0.5]   |
| Pleural effusion                                            | 0 [0.0, 2.4]          | 1 (0.2) [0.0, 0.9]   | 0 [0.0, 3.2]           | 1 (0.1) [0.0, 0.6]        | 0 [0.0, 2.7]            | 1 (0.1) [0.0, 0.5]   |
| Rhinorrhoea                                                 | 0 [0.0, 2.4]          | 0 [0.0, 0.6]         | 0 [0.0, 3.2]           | 0 [0.0, 0.4]              | 1 (0.7) [0.0, 4.0]      | 1 (0.1) [0.0, 0.5]   |
| Sinus congestion                                            | 0 [0.0, 2.4]          | 1 (0.2) [0.0, 0.9]   | 0 [0.0, 3.2]           | 1 (0.1) [0.0, 0.6]        | 0 [0.0, 2.7]            | 1 (0.1) [0.0, 0.5]   |
| <b>Investigations</b>                                       | 9 (5.8) [2.6, 11.0]   | 30 (4.6) [3.1, 6.6]  | 7 (6.2) [2.5, 12.7]    | 46 (5.0) [3.7, 6.7]       | 1 (0.7) [0.0, 4.0]      | 47 (4.4) [3.3, 5.9]  |

| <b>SOC, Preferred term,<br/>n (IR/ 100 PY)<br/>(95% CI)</b> | <b>FCAS<br/>N= 42</b> | <b>MWS<br/>N=169</b> | <b>NOMID<br/>N= 32</b> | <b>All CAPS<br/>N=243</b> | <b>Other*<br/>N= 42</b> | <b>ALL<br/>N=285</b> |
|-------------------------------------------------------------|-----------------------|----------------------|------------------------|---------------------------|-------------------------|----------------------|
| Protein urine present                                       | 4 (2.6) [0.7, 6.6]    | 3 (0.5) [0.1, 1.4]   | 5 (4.4) [1.4,10.3]     | 12 (1.3) [0.7, 2.3]       | 0 [0.0, 2.7]            | 12 (1.1) [0.6, 2.0]  |
| Weight gain                                                 | 1(0.6) [0.0, 3.6]     | 9 (1.4) [0.6, 2.6]   | 0 [0.0, 3.2]           | 10 (1.1) [0.5, 2.0]       | 0 [0.0, 2.7]            | 10 (0.9) [0.5, 1.7]  |
| Antinuclear antibody positive                               | 0 [0.0, 2.4]          | 4 (0.6) [0.2, 1.6]   | 0 [0.0, 3.2]           | 4 (0.4) [0.1, 1.1]        | 0 [0.0, 2.7]            | 4 (0.4) [0.1, 1.0]   |
| Hypercholesterolemia                                        | 3 (1.9) [0.4, 5.6]    | 0 [0.0, 0.6]         | 1 ( 0.9) [0.0, 4.9]    | 4 (0.4) [0.1, 1.1]        | 0 [0.0, 2.7]            | 4 (0.4) [0.1, 1.0]   |
| Liver enzymes elevated                                      | 1 (0.6) [0.0, 3.6]    | 3 (0.5) [0.1, 1.4]   | 0 [0.0, 3.2]           | 4 (0.4) [0.1, 1.1]        | 0 [0.0, 2.7]            | 4 (0.4) [0.1, 1.0]   |
| Gamma-glutamyl transferase increased                        | 0 [0.0, 2.4]          | 3 (0.5) [0.1, 1.4]   | 0 [0.0, 3.2]           | 3 (0.3) [0.1, 1.0]        | 0 [0.0, 2.7]            | 3 (0.3) [0.1, 0.9]   |
| Low density lipoprotein increased                           | 0 [0.0, 2.4]          | 1 (0.2) [0.0, 0.9]   | 1 (0.9) [0.0, 4.9]     | 2 (0.2) [0.0, 0.8]        | 0 [0.0, 2.7]            | 2 (0.2) [0.0, 0.7]   |
| Alanine aminotransferase increased                          | 0 [0.0, 2.4]          | 1 (0.2) [0.0, 0.9]   | 0 [0.0, 3.2]           | 1 (0.1) [0.0, 0.6]        | 0 [0.0, 2.7]            | 1 (0.1) [0.0, 0.5]   |
| Aspartate aminotransferase increased                        | 0 [0.0, 2.4]          | 1 (0.2) [0.0, 0.9]   | 0 [0.0, 3.2]           | 1 (0.1) [0.0, 0.6]        | 0 [0.0, 2.7]            | 1 (0.1) [0.0, 0.5]   |
| Blood creatinine phosphokinase increased                    | 0 [0.0, 2.4]          | 1 (0.2) [0.0, 0.9]   | 0 [0.0, 3.2]           | 1 (0.1) [0.0, 0.6]        | 0 [0.0, 2.7]            | 1 (0.1) [0.0, 0.5]   |
| Blood glucose increased                                     | 0 [0.0, 2.4]          | 1 (0.2) [0.0, 0.9]   | 0 [0.0, 3.2]           | 1 (0.1) [0.0, 0.6]        | 0 [0.0, 2.7]            | 1 (0.1) [0.0, 0.5]   |

| <b>SOC, Preferred term,<br/>n (IR/ 100 PY)<br/>(95% CI)</b> | <b>FCAS<br/>N= 42</b> | <b>MWS<br/>N=169</b> | <b>NOMID<br/>N= 32</b> | <b>All CAPS<br/>N=243</b> | <b>Other*<br/>N= 42</b> | <b>ALL<br/>N=285</b> |
|-------------------------------------------------------------|-----------------------|----------------------|------------------------|---------------------------|-------------------------|----------------------|
| Creatinine renal clearance decreased                        | 0 [0.0, 2.4]          | 1 (0.2) [0.0, 0.9]   | 0 [0.0, 3.2]           | 1 (0.1) [0.0, 0.6]        | 0 [0.0, 2.7]            | 1 (0.1) [0.0, 0.5]   |
| Haemoglobin decreased                                       | 0 [0.0, 2.4]          | 1 (0.2) [0.0, 0.9]   | 0 (0) [0.0, 3.2]       | 1 (0.1) [0.0, 0.6]        | 0 (0) [0.0, 2.7]        | 1 (0.1) [0.0, 0.5]   |
| Serum amyloid A protein increased                           | 0 [0.0, 2.4]          | 0 [0.0, 0.6]         | 0 [0.0, 3.2]           | 0 [0.0, 0.4]              | 1 (0.7) [0.0, 4.0]      | 1 (0.1) [0.0, 0.5]   |
| Urine protein/creatinine ratio increased                    | 0 [0.0, 2.4]          | 1 (0.2) [0.0, 0.9]   | 0 [0.0, 3.2]           | 1 (0.1) [0.0, 0.6]        | 0 [0.0, 2.7]            | 1 (0.1) [0.0, 0.5]   |
| <b>Ear and labyrinth disorders</b>                          | 2 (1.3) [0.2, 4.6]    | 28 (4.3) [2.9, 6.2]  | 12 (10.5) [5.5, 18.4]  | 42 (4.6) [3.3, 6.2]       | 4 (2.9) [0.8, 7.3]      | 46 (4.3)[3.2, 5.8]   |
| Vertigo                                                     | 1 (0.6) [0.0, 3.6]    | 21 (3.2) [2.0, 5.0]  | 9 ( 7.9) [3.6,15.0]    | 31 (3.4) [2.3, 4.8]       | 3 (2.2) [0.4, 6.3]      | 34 (3.2)[2.2, 4.5]   |
| Ear pain                                                    | 0 [0.0, 2.4]          | 2 (0.3) [0.0, 1.1]   | 0 [0.0, 3.2]           | 2 (0.) [0.0, 0.8]         | 0 [0.0, 2.7]            | 2 (0.2) [0.0, 0.7]   |
| Tinnitus                                                    | 1 (0.6) [0.0, 3.6]    | 1 (0.2) [0.0, 0.9]   | 0 [0.0, 3.2]           | 2 (0.2) [0.0, 0.8]        | 0 [0.0, 2.7]            | 2 (0.2) [0.0, 0.7]   |
| Tympanic membrane perforation                               | 0 [0.0, 2.4]          | 1 (0.2) [0.0, 0.9]   | 1 (0.9) [0.0, 4.9]     | 2 (0.2) [0.0, 0.8]        | 0 [0.0, 2.7]            | 2 (0.2) [0.0, 0.7]   |
| Deafness                                                    | 0 [0.0, 2.4]          | 0 [0.0, 0.6]         | 1 (0.9) [0.0, 4.9]     | 1 (0.1) [0.0, 0.6]        | 0 [0.0, 2.7]            | 1 (0.1) [0.0, 0.5]   |
| Deafness unilateral                                         | 0 [0.0, 2.4]          | 0 [0.0, 0.6]         | 0 [0.0, 3.2]           | 0 [0.0, 0.4]              | 1 (0.7) [0.0, 4.0]      | 1 (0.1) [0.0, 0.5]   |
| Eustachian tube disorder                                    | 0 [0.0, 2.4]          | 1 (0.2) [0.0, 0.9]   | 0 [0.0, 3.2]           | 1 (0.1) [0.0, 0.6]        | 0 (0) [0.0, 2.7]        | 1 (0.1) [0.0, 0.5]   |
| External ear inflammation                                   | 0 [0.0, 2.4]          | 1 (0.2) [0.0, 0.9]   | 0 [0.0, 3.2]           | 1 (0.1) [0.0, 0.6]        | 0 (0) [0.0, 2.7]        | 1 (0.1) [0.0, 0.5]   |



| <b>SOC, Preferred term,<br/>n (IR/ 100 PY)<br/>(95% CI)</b> | <b>FCAS<br/>N= 42</b> | <b>MWS<br/>N=169</b> | <b>NOMID<br/>N= 32</b> | <b>All CAPS<br/>N=243</b> | <b>Other*<br/>N= 42</b> | <b>ALL<br/>N=285</b> |
|-------------------------------------------------------------|-----------------------|----------------------|------------------------|---------------------------|-------------------------|----------------------|
| Hearing impaired                                            | 0 [0.0, 2.4]          | 0 [0.0, 0.6]         | 1 (0.9) [0.0, 4.9]     | 1 (0.1) [0.0, 0.6]        | 0 [0.0, 2.7]            | 1 (0.1) [0.0, 0.5]   |
| Sudden hearing loss                                         | 0 [0.0, 2.4]          | 1 (0.2) [0.0, 0.9]   | 0 [0.0, 3.2]           | 1 (0.1) [0.0, 0.6]        | 0 [0.0, 2.7]            | 1 (0.1) [0.0, 0.5]   |
| <b>Skin and<br/>subcutaneous tissue<br/>damage</b>          | 6 (3.9) [1.4, 8.4]    | 28 (4.3) [2.9, 6.2]  | 8 (7.0) [3.0, 13.9]    | 42 (4.6) [3.3, 6.2]       | 4 (2.9) [0.8 7.3]       | 46 (4.4) [3.2, 5.8]  |
| Rash                                                        | 0 [0.0, 2.4]          | 8 (1.2) [0.5, 2.4]   | 1 ( 0.9) [0.0, 4.9]    | 9 (1.0) [0.4, 1.9]        | 2 (1.4) [0.2, 5.2]      | 11 (1.0) [0.5, 1.9]  |
| Urticaria                                                   | 2 (1.3) [0.2, 4.6]    | 2 (0.3) [0.0, 1.1]   | 1 (0.9) [0.0, 4.9]     | 5 (0.5) [0.2, 1.3]        | 0 [0.0, 2.7]            | 5 (0.5) [0.2, 1.1]   |
| Eczema                                                      | 0 [0.0, 2.4]          | 3 (0.5) [0.1, 1.4]   | 1 (0.9) [0.0, 4.9]     | 4 (0.4) [0.1, 1.1]        | 0 [0.0, 2.7]            | 4 (0.4) [0.1, 1.0]   |
| Dry skin                                                    | 0 [0.0, 2.4]          | 1 (0.2) [0.0, 0.9]   | 1 ( 0.9) [0.0, 4.9]    | 2 (0.2) [0.0, 0.8]        | 0 [0.0, 2.7]            | 2 (0.2) [0.0, 0.7]   |
| Erythema                                                    | 0 [0.0, 2.4]          | 1 (0.2) [0.0, 0.9]   | 1 ( 0.9) [0.0, 4.9]    | 2 (0.2) [0.0, 0.8]        | 0 [0.0, 2.7]            | 2 (0.2) [0.0, 0.7]   |
| Perivascular dermatitis                                     | 0 [0.0, 2.4]          | 2 (0.3) [0.0, 1.1]   | 0 [0.0, 3.2]           | 2 (0.2) [0.0, 0.8]        | 0 [0.0, 2.7]            | 2 (0.2) [0.0, 0.7]   |
| Pruritus generalised                                        | 0 [0.0, 2.4]          | 1 (0.2) [0.0, 0.9]   | 0 [0.0, 3.2]           | 1 (0.1) [0.0, 0.6]        | 1 (0.7) [0.0, 4.0]      | 2 (0.2) [0.0, 0.7]   |
| Rash erythematous                                           | 0 [0.0, 2.4]          | 0 [0.0, 0.6]         | 2 (1.8) [0.2, 6.4]     | 2 (0.2) [0.0, 0.8]        | 0 [0.0, 2.7]            | 2 (0.2) [0.0, 0.7]   |
| Acne                                                        | 0 [0.0, 2.4]          | 1 (0.2) [0.0, 0.9]   | 0 [0.0, 3.2]           | 1 (0.1) [0.0, 0.6]        | 0 [0.0, 2.7]            | 1 (0.1) [0.0, 0.5]   |
| Alopecia                                                    | 0 [0.0, 2.4]          | 1 (0.2) [0.0, 0.9]   | 0 [0.0, 3.2]           | 1 (0.1) [0.0, 0.6]        | 0 [0.0, 2.7]            | 1 (0.1) [0.0, 0.5]   |
| Dermatitis atopic                                           | 0 [0.0, 2.4]          | 0 [0.0, 0.6]         | 0 [0.0, 3.2]           | 0 [0.0, 0.4]              | 1 (0.7) [0.0, 4.0]      | 1 (0.1) [0.0, 0.5]   |
| Hyperhidrosis                                               | 0 [0.0, 2.4]          | 1 (0.2) [0.0, 0.9]   | 0 [0.0, 3.2]           | 1 (0.1) [0.0, 0.6]        | 0 [0.0, 2.7]            | 1 (0.1) [0.0, 0.5]   |

| SOC, Preferred term, n (IR/ 100 PY) (95% CI)          | FCAS N= 42         | MWS N=169           | NOMID N= 32        | All CAPS N=243     | Other* N= 42       | ALL N=285           |
|-------------------------------------------------------|--------------------|---------------------|--------------------|--------------------|--------------------|---------------------|
| Night sweats                                          | 0 [0.0, 2.4]       | 1 (0.2) [0.0, 0.9]  | 0 [0.0, 3.2]       | 1 (0.1) [0.0, 0.6] | 0 [0.0, 2.7]       | 1 (0.1) [0.0, 0.5]  |
| Pigmentation disorder                                 | 1 (0.6) [0.0, 3.6] | 0 [0.0, 0.6]        | 0 [0.0, 3.2]       | 1 (0.1) [0.0, 0.6] | 0 [0.0, 2.7]       | 1 (0.1) [0.0, 0.5]  |
| Pruritus                                              | 0 [0.0, 2.4]       | 0 [0.0, 0.6]        | 1 (0.9) [0.0, 4.9] | 1 (0.1) [0.0, 0.6] | 0 [0.0, 2.7]       | 1 (0.1) [0.0, 0.5]  |
| Pruritus allergic                                     | 0 [0.0, 2.4]       | 1 (0.2) [0.0, 0.9]  | 0 [0.0, 3.2]       | 1 (0.1) [0.0, 0.6] | 0 [0.0, 2.7]       | 1 (0.1) [0.0, 0.5]  |
| Psoriasis                                             | 0 [0.0, 2.4]       | 1 (0.2) [0.0, 0.9]  | 0 [0.0, 3.2]       | 1 (0.1) [0.0, 0.6] | 0 [0.0, 2.7]       | 1 (0.1) [0.0, 0.5]  |
| Rash generalised                                      | 0 [0.0, 2.4]       | 1 (0.2) [0.0, 0.9]  | 0 [0.0, 3.2]       | 1 (0.1) [0.0, 0.6] | 0 [0.0, 2.7]       | 1 (0.1) [0.0, 0.5]  |
| Skin disorder                                         | 1 (0.6) [0.0, 3.6] | 0 [0.0, 0.6]        | 0 [0.0, 3.2]       | 1 (0.1) [0.0, 0.6] | 0 [0.0, 2.7]       | 1 (0.1) [0.0, 0.5]  |
| Skin exfoliation                                      | 0 [0.0, 2.4]       | 1 (0.2) [0.0, 0.9]  | 0 [0.0, 3.2]       | 1 (0.1) [0.0, 0.6] | 0 [0.0, 2.7]       | 1 (0.1) [0.0, 0.5]  |
| Skin lesion                                           | 0 [0.0, 2.4]       | 1 (0.2) [0.0, 0.9]  | 0 [0.0, 3.2]       | 1 (0.1) [0.0, 0.6] | 0 [0.0, 2.7]       | 1 (0.1) [0.0, 0.5]  |
| Skin ulcer                                            | 1 (0.6) [0.0, 3.6] | 0 [0.0, 0.6]        | 0 [0.0, 3.2]       | 1 (0.1) [0.0, 0.6] | 0 [0.0, 2.7]       | 1 (0.1) [0.0, 0.5]  |
| Swelling face                                         | 0 [0.0, 2.4]       | 1 (0.2) [0.0, 0.9]  | 0 [0.0, 3.2]       | 1 (0.1) [0.0, 0.6] | 0 [0.0, 2.7]       | 1 (0.1) [0.0, 0.5]  |
| Xanthelasma                                           | 1 (0.6) [0.0, 3.6] | 0 [0.0, 0.6]        | 0 [0.0, 3.2]       | 1 (0.1) [0.0, 0.6] | 0 [0.0, 3.2]       | 1 (0.1) [0.0, 0.5]  |
| <b>Injury, poisoning and procedural complications</b> | 6 (3.8) [1.4, 8.4] | 29 (4.5) [3.0, 6.4] | 0 [0.0, 3.2]       | 35 (3.8)[2.7, 5.3] | 8 (5.7)[2.5, 11.3] | 43 (4.1) [2.9, 5.5] |
| Fall                                                  | 3 (1.9) [0.4, 5.6] | 3 (0.5) [0.1, 1.4]  | 0 [0.0, 3.2]       | 6 (0.7) [0.2, 1.4] | 3 (2.1) [0.4, 6.3] | 9 (0.9) [0.4, 1.6]  |
| Ligament sprain                                       | 0 [0.0, 2.4]       | 4 (0.6) [0.2, 1.6]  | 0 [0.0, 3.2]       | 4 (0.4) [0.1, 1.1] | 1 (0.7) [0.0, 4.0] | 5 (0.5) [0.2, 1.1]  |

| <b>SOC, Preferred term,<br/>n (IR/ 100 PY)<br/>(95% CI)</b> | <b>FCAS<br/>N= 42</b> | <b>MWS<br/>N=169</b> | <b>NOMID<br/>N= 32</b> | <b>All CAPS<br/>N=243</b> | <b>Other*<br/>N= 42</b> | <b>ALL<br/>N=285</b> |
|-------------------------------------------------------------|-----------------------|----------------------|------------------------|---------------------------|-------------------------|----------------------|
| Vaccination complication                                    | 0 [0.0, 2.4]          | 4 (0.6) [0.2, 1.6]   | 0 [0.0, 3.2]           | 4 (0.4) [0.1, 1.1]        | 0 [0.0, 3.2]            | 4 (0.4) [0.1, 0.1]   |
| Procedural headache                                         | 0 [0.0, 2.4]          | 3 (0.5) [0.1, 1.4]   | 0 [0.0, 3.2]           | 3 (0.3) [0.1, 1.0]        | 0 [0.0, 2.7]            | 3 (0.3) [0.1, 0.8]   |
| Procedural nausea                                           | 0 [0.0, 2.4]          | 3 (0.5) [0.1, 1.4]   | 0 [0.0, 3.2]           | 3 (0.3) [0.1, 1.0]        | 0 [0.0, 2.7]            | 3 (0.3) [0.1, 0.8]   |
| Eschar                                                      | 0 [0.0, 2.4]          | 0 [0.0, 0.6]         | 0 [0.0, 3.2]           | 0 [0.0, 0.4]              | 2 (1.4) [0.2, 5.2]      | 2 (0.2) [0.0, 0.7]   |
| Ankle fracture                                              | 0 [0.0, 2.4]          | 1 (0.2) [0.0, 0.9]   | 0 [0.0, 3.2]           | 1 (0.1) [0.0, 0.6]        | 0 [0.0, 2.7]            | 1 (0.1) [0.0, 0.5]   |
| Clavicle fracture                                           | 0 [0.0, 2.4]          | 1 (0.2) [0.0, 0.9]   | 0 [0.0, 3.2]           | 1 (0.1) [0.0, 0.6]        | 0 [0.0, 2.7]            | 1 (0.1) [0.0, 0.5]   |
| Contusion                                                   | 0 [0.0, 2.4]          | 1 (0.2) [0.0, 0.9]   | 0 [0.0, 3.2]           | 1 (0.1) [0.0, 0.6]        | 0 [0.0, 2.7]            | 1 (0.1) [0.0, 0.5]   |
| Facial bones fracture                                       | 0 [0.0, 2.4]          | 1 (0.2) [0.0, 0.9]   | 0 [0.0, 3.2]           | 1 (0.1) [0.0, 0.6]        | 0 [0.0, 2.7]            | 1 (0.1) [0.0, 0.5]   |
| Femur fracture                                              | 0 [0.0, 2.4]          | 0 [0.0, 0.6]         | 0 [0.0, 3.2]           | 0 [0.0, 0.4]              | 1 (0.7) [0.0, 4.0]      | 1 (0.1) [0.0, 0.5]   |
| Forearm fracture                                            | 0 [0.0, 2.4]          | 1 (0.2) [0.0, 0.9]   | 0 [0.0, 3.2]           | 1 (0.1) [0.0, 0.6]        | 0 [0.0, 2.7]            | 1 (0.1) [0.0, 0.5]   |
| Hand fracture                                               | 0 [0.0, 2.4]          | 1 (0.2) [0.0, 0.9]   | 0 [0.0, 3.2]           | 1 (0.1) [0.0, 0.6]        | 0 [0.0, 2.7]            | 1 (0.1) [0.0, 0.5]   |
| Nail avulsion                                               | 0 [0.0, 2.4]          | 1 (0.2) [0.0, 0.9]   | 0 [0.0, 3.2]           | 1 (0.1) [0.0, 0.6]        | 0 [0.0, 2.7]            | 1 (0.09) [0.0, 0.5]  |
| Overdose                                                    | 1 (0.6) [0.0, 3.6]    | 0 [0.0, 0.6]         | 0 [0.0, 3.2]           | 1 (0.1) [0.0, 0.6]        | 0 [0.0, 2.7]            | 1 (0.1) [0.0, 0.5]   |
| Post procedural complication                                | 0 [0.0, 2.4]          | 1 (0.2) [0.0, 0.9]   | 0 [0.0, 3.2]           | 1 (0.1) [0.0, 0.6]        | 0 [0.0, 2.7]            | 1 (0.1) [0.0, 0.5]   |
| Post procedural diarrhoea                                   | 0 [0.0, 2.4]          | 1 (0.2) [0.0, 0.9]   | 0 [0.0, 3.2]           | 1 (0.1) [0.0, 0.6]        | 0 [0.0, 2.7]            | 1 (0.1) [0.0, 0.5]   |

| SOC, Preferred term, n (IR/ 100 PY) (95% CI) | FCAS N= 42         | MWS N=169           | NOMID N= 32         | All CAPS N=243      | Other* N= 42       | ALL N=285           |
|----------------------------------------------|--------------------|---------------------|---------------------|---------------------|--------------------|---------------------|
| Post procedural haemorrhage                  | 0 [0.0, 2.4]       | 1 (0.2) [0.0, 0.9]  | 0 [0.0, 3.2]        | 1 (0.1) [0.0, 0.6]  | 0 [0.0, 2.7]       | 1 (0.1) [0.0, 0.5]  |
| Procedural pain                              | 0 [0.0, 2.4]       | 1 (0.2) [0.00, 0.9] | 0 [0.0, 3.2]        | 1 (0.1) [0.00, 0.6] | 0 [0.0, 2.7]       | 1 (0.1) [0.0, 0.5]  |
| Radius fracture                              | 1 (0.6) [0.0, 3.6] | 0 [0.0, 0.6]        | 0 [0.0, 3.2]        | 1 (0.1) [0.0, 0.6]  | 0 [0.0, 2.7]       | 1 (0.1) [0.0, 0.5]  |
| Rib fracture                                 | 0 [0.0, 2.4]       | 1 (0.2) [0.00, 0.9] | 0 [0.0, 3.2]        | 1 (0.1) [0.00, 0.6] | 0 [0.0, 2.7]       | 1 (0.1) [0.0, 0.5]  |
| Tibia fracture                               | 0 [0.0, 2.4]       | 0 [0.0, 0.6]        | 0 [0.0, 3.2]        | 0 [0.0, 0.4]        | 1 (0.7) [0.0, 4.0] | 1 (0.1) [0.0, 0.5]  |
| Vaginal laceration                           | 1 (0.6) [0.0, 3.6] | 0 [0.0, 0.6]        | 0 [0.0, 3.2]        | 1 (0.1) [0.0, 0.6]  | 0 [0.0, 2.7]       | 1 (0.1) [0.0, 0.5]  |
| <b>Eye disorders</b>                         | 4 (2.6) [0.7, 6.6] | 20 (3.1) [1.9, 4.8] | 5 (4.4) [1.4, 10.3] | 29 (3.2) [2.1, 4.5] | 5 (3.6) [1.2, 8.3] | 34 (3.2) [2.2, 4.5] |
| Cataract                                     | 0 [0.0, 2.4]       | 4 (0.6) [0.2, 1.6]  | 0 [0.0, 3.2]        | 4 (0.4) [0.1, 1.1]  | 0 [0.0, 2.7]       | 4 (0.4) [0.1, 0.2]  |
| Iritis                                       | 1 (0.6) [0.0, 3.6] | 2 (0.3) [0.0, 1.1]  | 0 [0.0, 3.2]        | 3 (0.3) [0.1, 1.0]  | 0 [0.0, 2.7]       | 3 (0.3) [0.1, 0.8]  |
| Uveitis                                      | 0 [0.0, 2.4]       | 1 (0.2) [0.0, 0.9]  | 1 (0.9) [0.0, 4.9]  | 2 (0.2) [0.0, 0.8]  | 1 (0.7) [0.0, 4.0] | 3 (0.3) [0.1, 0.8]  |
| Eye inflammation                             | 0 [0.0, 2.4]       | 1 (0.2) [0.0, 0.9]  | 0 [0.0, 3.2]        | 1 (0.1) [0.0, 0.6]  | 1 (0.7) [0.0, 4.0] | 2 (0.2) [0.0, 0.7]  |
| Eye pruritus                                 | 0 [0.0, 2.4]       | 1 (0.2) [0.0, 0.9]  | 1 (0.9) [0.0, 5.0]  | 2 (0.2) [0.0, 0.8]  | 0 [0.0, 2.7]       | 2 (0.2) [0.0, 0.7]  |
| Glaucoma                                     | 0 [0.0, 2.4]       | 1 (0.2) [0.0, 0.9]  | 1 (0.9) [0.0, 4.9]  | 2 (0.2) [0.0, 0.8]  | 0 [0.0, 2.7]       | 2 (0.2) [0.0, 0.7]  |
| Iridocyclitis                                | 2 (1.3) [0.2, 4.6] | 0 [0.0, 0.6]        | 0 [0.0, 3.2]        | 2 (0.2) [0.0, 0.8]  | 0 [0.0, 2.7]       | 2 (0.2) [0.0, 0.7]  |
| Ocular hyperaemia                            | 0 [0.0, 2.4]       | 1 (0.2) [0.0, 0.9]  | 0 [0.0, 3.2]        | 1 (0.1) [0.0, 0.6]  | 1 (0.7) [0.0, 4.0] | 2 (0.2) [0.0, 0.7]  |

| SOC, Preferred term, n (IR/ 100 PY) (95% CI) | FCAS N= 42         | MWS N=169          | NOMID N= 32        | All CAPS N=243      | Other* N= 42        | ALL N=285           |
|----------------------------------------------|--------------------|--------------------|--------------------|---------------------|---------------------|---------------------|
| Papilloedema                                 | 0 [0.0, 2.4]       | 2 (0.3) [0.0, 1.1] | 0 [0.0, 3.2]       | 2 (0.2) [0.0, 0.8]  | 0 [0.0, 2.7]        | 2 (0.2) [0.0, 0.7]  |
| Arcus lipoides                               | 1 (0.6) [0.0, 3.6] | 0 [0.0, 0.6]       | 0 [0.0, 3.2]       | 1 (0.1) [0.0, 0.6]  | 0 [0.0, 2.7]        | 1 (0.1) [0.0, 0.5]  |
| Blepharitis                                  | 0 [0.0, 2.4]       | 1 (0.2) [0.0, 0.9] | 0 [0.0, 3.2]       | 1 (0.1) [0.0, 0.6]  | 0 [0.0, 2.7]        | 1 (0.1) [0.0, 0.5]  |
| Blindness                                    | 0 [0.0, 2.4]       | 1 (0.2) [0.0, 0.9] | 0 [0.0, 3.2]       | 1 (0.1) [0.0, 0.6]  | 0 [0.0, 2.7]        | 1 (0.1) [0.0, 0.5]  |
| Conjunctival hyperaemia                      | 0 [0.0, 2.4]       | 0 0 [0.0, 0.6]     | 1 (0.9) [0.0, 4.9] | 1 (0.1) [0.0, 0.6]  | 0 [0.0, 2.7]        | 1 (0.1) [0.0, 0.5]  |
| Diplopia                                     | 0 [0.0, 2.4]       | 0 0 [0.0, 0.6]     | 1 (0.9) [0.0, 4.9] | 1 (0.1) [0.0, 0.6]  | 0 [0.0, 2.7]        | 1 (0.1) [0.0, 0.5]  |
| Dry eye                                      | 0 [0.0, 2.4]       | 0 0 [0.0, 0.6]     | 0 [0.0, 3.2]       | 0 [0.0, 0.4]        | 1 (0.72) [0.0, 4.0] | 1 (0.1) [0.0, 0.5]  |
| Episcleritis                                 | 0 [0.0, 2.4]       | 1 (0.2) [0.0, 0.9] | 0 [0.0, 3.2]       | 1 (0.1) [0.0, 0.6]  | 0 [0.0, 2.7]        | 1 (0.1) [0.0, 0.5]  |
| Eye pain                                     | 0 [0.0, 2.4]       | 1 (0.2) [0.0, 0.9] | 0 [0.0, 3.2]       | 1 (0.1) [0.0, 0.6]  | 0 [0.0, 2.7]        | 1 (0.1) [0.0, 0.5]  |
| Eyelid rash                                  | 0 [0.0, 2.4]       | 0 0 [0.0, 0.6]     | 0 [0.0, 3.2]       | 0 [0.0, 0.4]        | 1 (0.7) [0.0, 4.0]  | 1 (0.1) [0.0, 0.5]  |
| Lacrimation increased                        | 0 [0.0, 2.4]       | 1 (0.2) [0.0, 0.9] | 0 [0.0, 3.2]       | 1 (0.1) [0.0, 0.6]  | 0 [0.0, 2.7]        | 1 (0.1) [0.0, 0.5]  |
| Photophobia                                  | 0 [0.0, 2.4]       | 1 (0.2) [0.0, 0.9] | 0 [0.0, 3.2]       | 1 (0.1) [0.0, 0.6]  | 0 [0.0, 2.7]        | 1 (0.1) [0.0, 0.5]  |
| Visual acuity reduced                        | 0 [0.0, 2.4]       | 1 (0.2) [0.0, 0.9] | 0 [0.0, 3.2]       | 1 (0.1) [0.0, 0.6]  | 0 [0.0, 2.7]        | 1 (0.1) [0.0, 0.5]  |
| <b>Blood and lymphatic system disorders</b>  | 0 [0.0, 2.4]       | 9 (1.4) [0.6, 2.6] | 1(0.9) [0.0, 4.9]  | 10 (1.1) [0.5, 2.0] | 5 (3.6) [1.2, 8.4]  | 15 (1.4) [0.8, 2.3] |
| Anaemia                                      | 0 [0.0, 2.4]       | 3 (0.5) [0.1, 1.4] | 0 [0.0, 3.2]       | 3 (0.3) [0.1, 1.0]  | 0 [0.0, 2.7]        | 3 (0.3) [0.1, 0.8]  |
| Iron deficiency anaemia                      | 0 [0.0, 2.4]       | 2 (0.3) [0.0, 1.1] | 0 [0.0, 3.2]       | 2 (0.2) [0.0, 0.8]  | 0 [0.0, 2.7]        | 2 (0.2) [0.0, 0.7]  |

| <b>SOC, Preferred term,<br/>n (IR/ 100 PY)<br/>(95% CI)</b>                            | <b>FCAS<br/>N= 42</b> | <b>MWS<br/>N=169</b> | <b>NOMID<br/>N= 32</b> | <b>All CAPS<br/>N=243</b> | <b>Other*<br/>N= 42</b> | <b>ALL<br/>N=285</b> |
|----------------------------------------------------------------------------------------|-----------------------|----------------------|------------------------|---------------------------|-------------------------|----------------------|
| Lymphadenopathy                                                                        | 0 [0.0, 2.4]          | 2 (0.3) [0.0, 1.1]   | 0 [0.0, 3.2]           | 2 (0.2) [0.0, 0.8]        | 0 [0.0, 2.7]            | 2 (0.2) [0.0, 0.7]   |
| Lymphopenia                                                                            | 0 [0.0, 2.4]          | 0 [0.0, 0.6]         | 0 [0.0, 3.2]           | 0 [0.0, 0.4]              | 2 (1.4) [0.2, 5.2]      | 2 (0.2) [0.0, 0.7]   |
| Thrombocytopenia                                                                       | 0 [0.0, 2.4]          | 1 (0.2) [0.0, 0.9]   | 0 [0.0, 3.2]           | 1 (0.1) [0.0, 0.6]        | 1 (0.7) [0.0, 4.0]      | 2 (0.2) [0.0, 0.7]   |
| Increased tendency to<br>bruise                                                        | 0 [0.0, 2.4]          | 0 [0.0, 0.6]         | 1 (0.9) [0.0, 4.9]     | 1 (0.1) [0.0, 0.6]        | 0 [0.0, 2.7]            | 1 (0.1) [0.0, 0.5]   |
| Lymphocytic infiltration                                                               | 0 [0.0, 2.4]          | 1 (0.2) [0.0, 0.9]   | 0 [0.0, 3.2]           | 1 (0.1) [0.0, 0.6]        | 0 [0.0, 2.7]            | 1 (0.1) [0.0, 0.5]   |
| Microcytosis                                                                           | 0 [0.0, 2.4]          | 0 [0.0, 0.6]         | 0 [0.0, 3.2]           | 0 [0.0, 0.4]              | 1 (0.7) [0.0, 4.0]      | 1 (0.1) [0.0, 0.5]   |
| Neutropenia                                                                            | 0 [0.0, 2.4]          | 0 [0.0, 0.6]         | 0 [0.0, 3.2]           | 0 [0.0, 0.4]              | 1 (0.7) [0.0, 4.0]      | 1 (0.1) [0.0, 0.5]   |
| <b>Neoplasms benign,<br/>malignant and<br/>unspecified (incl cysts<br/>and polyps)</b> | 1 (0.6) [0.0, 3.6]    | 13 (2.0) [1.1, 3.4]  | 0 [0.0, 3.2]           | 14 (1.5) [0.8, 2.6]       | 1 (0.7) [0.0, 4.0]      | 15 (1.4) [0.8, 2.3]  |
| Rectal cancer                                                                          | 0 [0.0, 2.4]          | 3 (0.5) [0.1, 1.4]   | 0 [0.0, 3.2]           | 3 (0.3) [0.1, 1.0]        | 0 [0.0, 2.7]            | 3 (0.3) [0.1, 0.8]   |
| Melanocyte naevus                                                                      | 0 [0.0, 2.4]          | 1 (0.2) [0.0, 0.9]   | 0 [0.0, 3.2]           | 1 (0.1) [0.0, 0.6]        | 1 (0.7) [0.0, 4.0]      | 2 (0.2) [0.0, 0.7]   |
| Uterine leiomyoma                                                                      | 0 [0.0, 2.4]          | 2 (0.3) [0.0, 1.1]   | 0 [0.0, 3.2]           | 2 (0.2) [0.0, 0.8]        | 0 [0.0, 2.7]            | 2 (0.2) [0.0, 0.7]   |
| Adenocarcinoma                                                                         | 0 [0.0, 2.4]          | 1 (0.2) [0.0, 0.9]   | 0 [0.0, 3.2]           | 1 (0.1) [0.0, 0.6]        | 0 [0.0, 2.7]            | 1 (0.1) [0.0, 0.5]   |
| Basal cell carcinoma                                                                   | 1 (0.6) [0.0, 3.6]    | 0 [0.0, 0.6]         | 0 [0.0, 3.2]           | 1 (0.1) [0.0, 0.6]        | 0 [0.0, 2.7]            | 1 (0.1) [0.0, 0.5]   |
| Gastrointestinal<br>neoplasm                                                           | 0 [0.0, 2.4]          | 1 (0.2) [0.0, 0.9]   | 0 [0.0, 3.2]           | 1 (0.1) [0.0, 0.6]        | 0 [0.0, 2.7]            | 1 (0.1) [0.0, 0.5]   |

| SOC, Preferred term, n (IR/ 100 PY) (95% CI) | FCAS N= 42   | MWS N=169           | NOMID N= 32  | All CAPS N=243      | Other* N= 42        | ALL N=285           |
|----------------------------------------------|--------------|---------------------|--------------|---------------------|---------------------|---------------------|
| Lipoma                                       | 0 [0.0, 2.4] | 1 (0.2) [0.0, 0.9]  | 0 [0.0, 3.2] | 1 (0.1) [0.0, 0.6]  | 0 [0.0, 2.7]        | 1 (0.1) [0.0, 0.5]  |
| Meningioma                                   | 0 [0.0, 2.4] | 1 (0.2) [0.0, 0.9]  | 0 [0.0, 3.2] | 1 (0.1) [0.0, 0.6]  | 0 [0.0, 2.7]        | 1 (0.1) [0.0, 0.5]  |
| Neurilemmoma benign                          | 0 [0.0, 2.4] | 1 (0.2) [0.0, 0.9]  | 0 [0.0, 3.2] | 1 (0.1) [0.0, 0.6]  | 0 [0.0, 2.7]        | 1 (0.1) [0.0, 0.5]  |
| Neurofibroma                                 | 0 [0.0, 2.4] | 1 (0.2) [0.0, 0.9]  | 0 [0.0, 3.2] | 1 (0.1) [0.0, 0.6]  | 0 [0.0, 2.7]        | 1 (0.1) [0.0, 0.5]  |
| Prostate cancer                              | 0 [0.0, 2.4] | 1 (0.2) [0.0, 0.9]  | 0 [0.0, 3.2] | 1 (0.1) [0.0, 0.6]  | 0 [0.0, 2.7]        | 1 (0.1) [0.0, 0.5]  |
| <b>Cardiac disorders</b>                     | 0 [0.0, 2.4] | 11 (1.7) [0.9, 3.0] | 0 [0.0, 3.2] | 11 (1.2) [0.6, 2.1] | 3 (2.2) [0.4, 6.3]  | 14 (1.3) [0.7, 2.2] |
| Angina pectoris                              | 0 [0.0, 2.4] | 5 (0.8) [0.3, 1.8]  | 0 [0.0, 3.2] | 5 (0.5) [0.2, 1.3]  | 0 [0.0, 2.7]        | 5 (0.5) [0.2, 1.1]  |
| Pericardial effusion                         | 0 [0.0, 2.4] | 1 (0.2) [0.0, 0.9]  | 0 [0.0, 3.2] | 1 (0.1) [0.0, 0.6]  | 1 (0.7) [0.02, 4.0] | 2 (0.2) [0.0, 0.7]  |
| Coronary artery disease                      | 0 [0.0, 2.4] | 1 (0.2) [0.0, 0.9]  | 0 [0.0, 3.2] | 1 (0.1) [0.0, 0.6]  | 0 [0.0, 2.7]        | 1 (0.1) [0.0, 0.5]  |
| Extrasystoles                                | 0 [0.0, 2.4] | 1 (0.2) [0.0, 0.9]  | 0 [0.0, 3.2] | 1 (0.1) [0.0, 0.6]  | 0 [0.0, 2.7]        | 1 (0.1) [0.0, 0.5]  |
| Mitral valve incompetence                    | 0 [0.0, 2.4] | 1 (0.2) [0.0, 0.9]  | 0 [0.0, 3.2] | 1 (0.1) [0.0, 0.6]  | 0 [0.0, 2.7]        | 1 (0.1) [0.0, 0.5]  |
| Palpitations                                 | 0 [0.0, 2.4] | 0 [0.0, 0.6]        | 0 [0.0, 3.2] | 0 [0.0, 0.4]        | 1 (0.7) [0.02, 4.0] | 1 (0.1) [0.0, 0.5]  |
| Supraventricular extrasystoles               | 0 [0.0, 2.4] | 1 (0.2) [0.0, 0.9]  | 0 [0.0, 3.2] | 1 (0.1) [0.0, 0.6]  | 0 [0.0, 2.7]        | 1 (0.1) [0.0, 0.5]  |
| Tachycardia                                  | 0 [0.0, 2.4] | 1 (0.2) [0.0, 0.9]  | 0 [0.0, 3.2] | 1 (0.1) [0.0, 0.6]  | 0 [0.0, 2.7]        | 1 (0.1) [0.0, 0.5]  |
| Ventricular tachycardia                      | 0 [0.0, 2.4] | 0 [0.0, 0.6]        | 0 [0.0, 3.2] | 0 [0.0, 0.4]        | 1 (0.7) [0.0, 4.0]  | 1 (0.1) [0.0, 0.5]  |

| SOC, Preferred term, n (IR/ 100 PY) (95% CI) | FCAS N= 42         | MWS N=169           | NOMID N= 32        | All CAPS N=243      | Other* N= 42       | ALL N=285           |
|----------------------------------------------|--------------------|---------------------|--------------------|---------------------|--------------------|---------------------|
| <b>Vascular disorders</b>                    | 1 (0.6) [0.0, 3.6] | 11 (1.7) [0.8, 3.0] | 0 [0.0, 3.2]       | 12 (1.3) [0.7, 2.3] | 1 (0.7) [0.0, 4.0] | 13 (1.2) [0.7, 2.1] |
| Hypertension                                 | 1 (0.6) [0.0, 3.6] | 2 (0.3) [0.0, 1.1]  | 0 [0.0, 3.2]       | 3 (0.3) [0.1, 1.0]  | 0 [0.0, 2.7]       | 3 (0.3) [0.1, 0.8]  |
| Peripheral venous disease                    | 0 [0.0, 2.4]       | 2 (0.3) [0.0, 1.1]  | 0 [0.0, 3.2]       | 2 (0.2) [0.0, 0.8]  | 0 [0.0, 2.7]       | 2 (0.2) [0.0, 0.7]  |
| Circulatory collapse                         | 0 [0.0, 2.4]       | 1 (0.2) [0.0, 0.9]  | 0 [0.0, 3.2]       | 1 (0.1) [0.0, 0.6]  | 0 [0.0, 2.7]       | 1 (0.1) [0.0, 0.5]  |
| Haematoma                                    | 0 [0.0, 2.4]       | 0 [0.0, 0.6]        | 0 [0.0, 3.2]       | 0 [0.0, 0.4]        | 1 (0.7) [0.0, 4.0] | 1 (0.1) [0.0, 0.5]  |
| Hot flush                                    | 0 [0.0, 2.4]       | 1 (0.2) [0.0, 0.9]  | 0 [0.0, 3.2]       | 1 (0.1) [0.0, 0.6]  | 0 [0.0, 2.7]       | 1 (0.1) [0.0, 0.5]  |
| Lymphoedema                                  | 0 [0.0, 2.4]       | 1 (0.2) [0.0, 0.9]  | 0 [0.0, 3.2]       | 1 (0.1) [0.0, 0.6]  | 0 [0.0, 2.7]       | 1 (0.1) [0.0, 0.5]  |
| Peripheral arterial occlusive disease        | 0 [0.0, 2.4]       | 1 (0.2) [0.0, 0.9]  | 0 [0.0, 3.2]       | 1 (0.1) [0.0, 0.6]  | 0 [0.0, 2.7]       | 1 (0.1) [0.0, 0.5]  |
| Phlebitis                                    | 0 [0.0, 2.4]       | 1 (0.2) [0.0, 0.9]  | 0 [0.0, 3.2]       | 1 (0.1) [0.0, 0.6]  | 0 [0.0, 2.7]       | 1 (0.1) [0.0, 0.5]  |
| Post thrombotic syndrome                     | 0 [0.0, 2.4]       | 1 (0.2) [0.0, 0.9]  | 0 [0.0, 3.2]       | 1 (0.1) [0.0, 0.6]  | 0 [0.0, 2.7]       | 1 (0.1) [0.0, 0.5]  |
| Vein disorder                                | 0 [0.0, 2.4]       | 1 (0.2) [0.0, 0.9]  | 0 [0.0, 3.2]       | 1 (0.1) [0.0, 0.6]  | 0 [0.0, 2.7]       | 1 (0.1) [0.0, 0.5]  |
| <b>Psychiatric disorders</b>                 | 0 [0.0, 2.4]       | 9 (1.4) [0.6, 2.6]  | 1 (0.9) [0.0, 4.9] | 10 (1.1) [0.5, 2.0] | 2 (1.4) [0.2, 5.2] | 12 (1.1) [0.6, 2.0] |
| Depression                                   | 0 [0.0, 2.4]       | 4 (0.6) [0.2, 1.6]  | 1 (0.9) [0.0, 4.9] | 5 (0.5) [0.2, 1.3]  | 0 [0.0, 2.7]       | 5 (0.5) [0.2, 1.1]  |
| Insomnia                                     | 0 [0.0, 2.4]       | 2 (0.3) [0.0, 1.1]  | 0 [0.0, 3.2]       | 2 (0.2) [0.0, 0.8]  | 0 [0.0, 2.7]       | 2 (0.2) [0.0, 0.7]  |
| Agitation                                    | 0 [0.0, 2.4]       | 1 (0.2) [0.0, 0.9]  | 0 [0.0, 3.2]       | 1 (0.1) [0.0, 0.6]  | 0 [0.0, 2.7]       | 1 (0.1) [0.0, 0.5]  |



| SOC, Preferred term, n (IR/ 100 PY) (95% CI)             | FCAS N= 42   | MWS N=169          | NOMID N= 32  | All CAPS N=243     | Other* N= 42       | ALL N=285           |
|----------------------------------------------------------|--------------|--------------------|--------------|--------------------|--------------------|---------------------|
| Anxiety                                                  | 0 [0.0, 2.4] | 1 (0.2) [0.0, 0.9] | 0 [0.0, 3.2] | 1 (0.1) [0.0, 0.6] | 0 [0.0, 2.7]       | 1 (0.1) [0.0, 0.5]  |
| Fear of injection                                        | 0 [0.0, 2.4] | 1 (0.2) [0.0, 0.9] | 0 [0.0, 3.2] | 1 (0.1) [0.0, 0.6] | 0 [0.0, 2.7]       | 1 (0.1) [0.0, 0.5]  |
| Nervousness                                              | 0 [0.0, 2.4] | 0 [0.0, 0.6]       | 0 [0.0, 3.2] | 0 [0.0, 0.4]       | 1 (0.7) [0.0, 4.0] | 1 (1.0) [0.0, 0.5]  |
| Somnambulism                                             | 0 [0.0, 2.4] | 0 [0.0, 0.6]       | 0 [0.0, 3.2] | 0 [0.0, 0.4]       | 1 (0.7) [0.0, 4.0] | 1 (1.0) [0.0, 0.5]  |
| <b>Congenital, familial and genetic disorders</b>        | 0 [0.0, 2.4] | 4 (0.6) [0.2, 1.6] | 0 [0.0, 3.2] | 4 (0.4) [0.1, 1.1] | 6 (4.3) [1.6, 9.3] | 10 (0.9) [0.5, 1.7] |
| Cryopyrin associated periodic syndrome                   | 0 [0.0, 2.4] | 3 (0.5) [0.1, 1.4] | 0 [0.0, 3.2] | 3 (0.3) [0.1, 1.0] | 2 (1.4) [0.2, 5.2] | 5 (0.5) [0.2, 1.1]  |
| Familial Mediterranean fever                             | 0 [0.0, 2.4] | 0 [0.0, 0.6]       | 0 [0.0, 3.2] | 0 [0.0, 0.4]       | 3 (2.2) [0.4, 6.3] | 3 (0.3) [0.1, 0.8]  |
| Gilbert's syndrome                                       | 0 [0.0, 2.4] | 0 [0.0, 0.6]       | 0 [0.0, 3.2] | 0 [0.0, 0.4]       | 1 (0.7) [0.0, 4.0] | 1 (0.1) [0.0, 0.5]  |
| Hereditary neuropathy with liability to pressure palsies | 0 [0.0, 2.4] | 1 (0.2) [0.0, 0.9] | 0 [0.0, 3.2] | 1 (0.1) [0.0, 0.6] | 0 [0.0, 2.7]       | 1 (0.1) [0.0, 0.5]  |
| <b>Hepatobiliary disorders</b>                           | 0 [0.0, 2.4] | 5 (0.8) [0.3, 1.8] | 0 [0.0, 3.2] | 5 (0.5) [0.2, 1.3] | 4 (2.9) [0.8, 7.3] | 9 (0.9) [0.4, 1.6]  |
| Cholelithiasis                                           | 0 [0.0, 2.4] | 3 (0.5) [0.1, 1.4] | 0 [0.0, 3.2] | 3 (0.3) [0.1, 1.0] | 0 [0.0, 2.7]       | 3 (0.3) [0.1, 0.8]  |
| Autoimmune hepatitis                                     | 0 [0.0, 2.4] | 0 [0.0, 0.6]       | 0 [0.0, 3.2] | 0 [0.0, 0.4]       | 1 (0.7) [0.0, 4.0] | 1 (0.1) [0.0, 0.5]  |
| Cholecystitis                                            | 0 [0.0, 2.4] | 1 (0.2) [0.0, 0.9] | 0 [0.0, 3.2] | 1 (0.1) [0.0, 0.6] | 0 [0.0, 2.7]       | 1 (0.1) [0.0, 0.5]  |

| SOC, Preferred term, n (IR/ 100 PY) (95% CI)    | FCAS N= 42         | MWS N=169          | NOMID N= 32        | All CAPS N=243     | Other* N= 42       | ALL N=285          |
|-------------------------------------------------|--------------------|--------------------|--------------------|--------------------|--------------------|--------------------|
| Cholestasis                                     | 0 [0.0, 2.4]       | 0 [0.0, 0.6]       | 0 [0.0, 3.2]       | 0 [0.0, 0.4]       | 1 (0.7) [0.0, 4.0] | 1 (0.1) [0.0, 0.5] |
| Hepatic steatosis                               | 0 [0.0, 2.4]       | 1 (0.2) [0.0, 0.9] | 0 [0.0, 3.2]       | 1 (0.1) [0.0, 0.6] | 0 [0.0, 2.7]       | 1 (0.1) [0.0, 0.5] |
| Hepatitis                                       | 0 [0.0, 2.4]       | 0 [0.0, 0.6]       | 0 [0.0, 3.2]       | 0 [0.0, 0.4]       | 1 (0.7) [0.0, 4.0] | 1 (0.1) [0.0, 0.5] |
| Hyperbilirubinaemia                             | 0 [0.0, 2.4]       | 0 [0.0, 0.6]       | 0 [0.0, 3.2]       | 0 [0.0, 0.4]       | 1 (0.7) [0.0, 4.0] | 1 (0.1) [0.0, 0.5] |
| <b>Immune system disorders</b>                  | 1 (0.6) [0.0, 3.6] | 4 (0.6) [0.2, 1.6] | 1 (0.9) [0.0, 4.9] | 6 (0.7) [0.2, 1.4] | 3 (2.1) [0.4, 6.3] | 9 (0.9) [0.4, 1.6] |
| Hypersensitivity                                | 0 [0.0, 2.4]       | 3 (0.5) [0.1, 1.4] | 1 (0.9) [0.0, 4.9] | 4 (0.4) [0.1, 1.1] | 0 [0.0, 2.7]       | 4 (0.4) [0.1, 1.0] |
| Seasonal allergy                                | 1 (0.6) [0.0, 3.6] | 1 (0.2) [0.0, 0.9] | 0 [0.0, 3.2]       | 2 (0.2) [0.0, 0.8] | 1(0.7) [0.0, 4.0]  | 3 (0.3) [0.1, 0.8] |
| Allergy to arthropod bite                       | 0 [0.0, 2.4]       | 0 [0.0, 0.6]       | 0 [0.0, 3.2]       | 0 [0.0, 0.4]       | 1 (0.7) [0.0, 4.0] | 1 (0.1) [0.0, 0.5] |
| Drug hypersensitivity                           | 0 [0.0, 2.4]       | 0 [0.0, 0.6]       | 0 [0.0, 3.2]       | 0 [0.0, 0.4]       | 1 (0.7) [0.0, 4.0] | 1 (1.0) [0.0, 0.5] |
| <b>Reproductive system and breast disorders</b> | 0 [0.0, 2.4]       | 8 (1.2) [0.5, 2.4] | 0 [0.0, 3.2]       | 8 (0.9) [0.4, 1.7] | 0 [0.0, 2.7]       | 8 (0.8) [0.3, 1.5] |
| Menstruation irregular                          | 0 [0.0, 2.4]       | 2 (0.3) [0.0, 1.1] | 0 [0.0, 3.2]       | 2 (0.2) [0.0, 0.8] | 0 [0.0, 2.7]       | 2 (0.2) [0.0, 0.7] |
| Breast mass                                     | 0 [0.0, 2.4]       | 1 (0.2) [0.0, 0.9] | 0 [0.0, 3.2]       | 1 (0.1) [0.0, 0.6] | 0 [0.0, 2.7]       | 1 (0.1) [0.0, 0.5] |
| Endometriosis                                   | 0 [0.0, 2.4]       | 1 (0.2) [0.0, 0.9] | 0 [0.0, 3.2]       | 1 (0.1) [0.0, 0.6] | 0 [0.0, 2.7]       | 1 (0.1) [0.0, 0.5] |
| Menopausal symptoms                             | 0 [0.0, 2.4]       | 1 (0.2) [0.0, 0.9] | 0 [0.0, 3.2]       | 1 (0.1) [0.0, 0.6] | 0 [0.0, 2.7]       | 1 (0.1) [0.0, 0.5] |
| Prostatitis                                     | 0 [0.0, 2.4]       | 1 (0.2) [0.0, 0.9] | 0 [0.0, 3.2]       | 1 (0.1) [0.0, 0.6] | 0 [0.0, 2.7]       | 1 (0.1) [0.0, 0.5] |

| SOC, Preferred term, n (IR/ 100 PY) (95% CI)          | FCAS N= 42         | MWS N=169          | NOMID N= 32  | All CAPS N=243     | Other* N= 42       | ALL N=285          |
|-------------------------------------------------------|--------------------|--------------------|--------------|--------------------|--------------------|--------------------|
| Uterine polyp                                         | 0 [0.0, 2.4]       | 1 (0.2) [0.0, 0.9] | 0 [0.0, 3.2] | 1 (0.1) [0.0, 0.6] | 0 [0.0, 2.7]       | 1 (0.1) [0.0, 0.5] |
| Vulvovaginal dryness                                  | 0 [0.0, 2.4]       | 1 (0.2) [0.0, 0.9] | 0 [0.0, 3.2] | 1 (0.1) [0.0, 0.6] | 0 [0.0, 2.7]       | 1 (0.1) [0.0, 0.5] |
| <b>Metabolism and nutritional disorders</b>           | 1 (0.6) [0.0, 3.6] | 4 (0.6) [0.2, 1.6] | 0 [0.0, 3.2] | 5 (0.5) [0.2, 1.3] | 0 [0.0, 2.7]       | 5 (0.5) [0.2, 1.1] |
| Diabetes mellitus                                     | 0 [0.0, 2.4]       | 2 (0.3) [0.0, 1.1] | 0 [0.0, 3.2] | 2 (0.2) [0.0, 0.8] | 0 [0.0, 2.7]       | 2 (0.2) [0.0, 0.7] |
| Decreased appetite                                    | 0 [0.0, 2.4]       | 1 (0.2) [0.0, 0.9] | 0 [0.0, 3.2] | 1 (0.1) [0.0, 0.6] | 0 [0.0, 2.7]       | 1 (0.1) [0.0, 0.5] |
| Increased appetite                                    | 0 [0.0, 2.4]       | 1 (0.2) [0.0, 0.9] | 0 [0.0, 3.2] | 1 (0.1) [0.0, 0.6] | 0 [0.0, 2.7]       | 1 (0.1) [0.0, 0.5] |
| Type 2 diabetes mellitus                              | 1 (0.6) [0.0, 3.6] | 0 [0.0, 0.6]       | 0 [0.0, 3.2] | 1 (0.1) [0.0, 0.6] | 0 [0.0, 2.7]       | 1 (0.1) [0.0, 0.5] |
| <b>Pregnancy, puerperium and perinatal conditions</b> | 0 [0.0, 2.4]       | 5 (0.8) [0.3, 1.8] | 0 [0.0, 3.2] | 5 (0.5) [0.2, 1.3] | 0 [0.0, 2.7]       | 5 (0.5) [0.2, 1.1] |
| Abortion spontaneous                                  | 0 [0.0, 2.4]       | 3 (0.5) [0.1, 1.4] | 0 [0.0, 3.2] | 3 (0.3) [0.1, 1.0] | 0 [0.0, 2.7]       | 3 (0.3) [0.1, 0.8] |
| Gestational diabetes                                  | 0 [0.0, 2.4]       | 1 (0.2) [0.0, 0.9] | 0 [0.0, 3.2] | 1 (0.1) [0.0, 0.6] | 0 [0.0, 2.7]       | 1 (0.1) [0.0, 0.5] |
| Pregnancy                                             | 0 [0.0, 2.4]       | 1 (0.2) [0.0, 0.9] | 0 [0.0, 3.2] | 1 (0.1) [0.0, 0.6] | 0 [0.0, 2.7]       | 1 (0.1) [0.0, 0.5] |
| <b>Endocrine disorders</b>                            | 1 (0.6) [0.0, 3.6] | 2 (0.3) [0.0, 1.1] | 0 [0.0, 3.2] | 3 (0.3) [0.1, 1.0] | 1 (0.7) [0.0, 4.0] | 4 (0.4) [0.1, 1.0] |
| Addison's disease                                     | 1 (0.6) [0.0, 3.6] | 0 [0.0, 0.6]       | 0 [0.0, 3.2] | 1 (0.1) [0.0, 0.6] | 0 [0.0, 2.7]       | 1 (0.1) [0.0, 0.5] |
| Cushingoid                                            | 0 [0.0, 2.4]       | 0 [0.0, 0.6]       | 0 [0.0, 3.2] | 0 [0.0, 0.4]       | 1 (0.7) [0.0, 4.0] | 1 (0.1) [0.0, 0.5] |
| Hypothyroidism                                        | 0 [0.0, 2.4]       | 1 (0.2) [0.0, 0.9] | 0 [0.0, 3.2] | 1 (0.1) [0.0, 0.6] | 0 [0.0, 2.7]       | 1 (0.1) [0.0, 0.5] |

| <b>SOC, Preferred term,<br/>n (IR/ 100 PY)<br/>(95% CI)</b> | <b>FCAS<br/>N= 42</b> | <b>MWS<br/>N=169</b> | <b>NOMID<br/>N= 32</b> | <b>All CAPS<br/>N=243</b> | <b>Other*<br/>N= 42</b> | <b>ALL<br/>N=285</b> |
|-------------------------------------------------------------|-----------------------|----------------------|------------------------|---------------------------|-------------------------|----------------------|
| Thyroid cyst                                                | 0 [0.0, 2.4]          | 1 (0.2) [0.0, 0.9]   | 0 [0.0, 3.2]           | 1 (0.1) [0.0, 0.6]        | 0 [0.0, 2.7]            | 1 (0.1) [0.0, 0.5]   |
| <b>Renal and urinary disorders</b>                          | 0 [0.0, 2.4]          | 4 (0.6) [0.2, 1.6]   | 0 [0.0, 3.2]           | 4 (0.4) [0.1, 1.1]        | 0 [0.0, 2.7]            | 4 (0.4) [0.1,1.0]    |
| Proteinuria                                                 | 0 [0.0, 2.4]          | 2 (0.3) [0.0, 1.1]   | 0 [0.0, 3.2]           | 2 (0.2) [0.0, 0.8]        | 0 [0.0, 2.7]            | 2 (0.2) [0.0, 0.7]   |
| Enuresis                                                    | 0 [0.0, 2.4]          | 1 (0.2) [0.0, 0.9]   | 0 [0.0, 3.2]           | 1 (0.1) [0.0, 0.6]        | 0 [0.0, 2.7]            | 1 (0.1) [0.0, 0.5]   |
| Renal failure                                               | 0 [0.0, 2.4]          | 1 (0.2) [0.0, 0.9]   | 0 [0.0, 3.2]           | 1 (0.1) [0.0, 0.6]        | 0 [0.0, 2.7]            | 1 (0.1) [0.0, 0.5]   |

\*Other includes atypical CAPS (n=18) and non-CAPS diagnoses (n=24); non-CAPS diagnoses include systemic juvenile idiopathic arthritis, unspecified autoinflammatory syndromes, familial Mediterranean fever, mevalonate kinase deficiency, adult-onset Still's disease, tumour necrosis factor-receptor associated periodic syndrome, Erdheim–Chester disease, Blau syndrome, and granulomatosis with polyangiitis.

AE, adverse events; CAPS, cryopyrin-associated periodic syndromes; FCAS, familial cold autoinflammatory syndrome; IL, interleukin; IR, incidence rates; MWS, Muckle–Wells syndrome; n, number of events; NOMID, neonatal-onset multisystem inflammatory disease; PY, patient-years; SOC, system organ class.

**Table S6** Frequency of adverse events by baseline canakinumab dose

|                                        | <b>FCAS<br/>(N=42)</b> | <b>MWS<br/>(N=169)</b> | <b>NOMID<br/>(N=32)</b> | <b>All CAPS<br/>(N=243)</b> | <b>Other*<br/>(N=42)</b> | <b>ALL<br/>(N=285)</b> |
|----------------------------------------|------------------------|------------------------|-------------------------|-----------------------------|--------------------------|------------------------|
| <b>Adverse events, % (m/n)</b>         |                        |                        |                         |                             |                          |                        |
| <2mg/kg                                | 25.0<br>(4/16)         | 90.7<br>(39/43)        | 50.0<br>(1/2)           | 72.1<br>(44/61)             | 77.8<br>(7/9)            | 72.9<br>(51/70)        |
| 2–<4mg/kg                              | 81.8<br>(18/22)        | 78.3<br>(65/83)        | 83.3<br>(15/18)         | 79.7<br>(98/123)            | 83.3<br>(20/24)          | 80.3<br>(118/147)      |
| 4–<8mg/kg                              |                        | 81.0<br>(17/21)        | 87.5<br>(7/8)           | 82.8<br>(24/29)             | 100<br>(4/4)             | 84.9<br>(28/33)        |
| >8mg/kg                                |                        | 0<br>(0/1)             | 100<br>(3/3)            | 75.0<br>(3/4)               |                          | 75.0<br>(3/4)          |
| Missing                                | 100<br>(4/4)           | 61.9<br>(13/21)        | 100<br>(1/1)            | 69.2<br>(18/26)             | 100<br>(5/5)             | 74.2<br>(23/31)        |
| <b>Serious adverse events, % (m/n)</b> |                        |                        |                         |                             |                          |                        |
| <2mg/kg                                | 0<br>(0/16)            | 39.5<br>(17/43)        | 0<br>(0/2)              | 27.9<br>(17/61)             | 33.3<br>(3/9)            | 28.6<br>(20/70)        |
| 2–<4mg/kg                              | 13.6<br>(3/22)         | 30.1<br>(25/83)        | 33.3<br>(6/18)          | 27.6<br>(34/123)            | 29.2<br>(7/24)           | 27.9<br>(41/147)       |
| 4–<8mg/kg                              |                        | 33.3<br>(7/21)         | 25.0<br>(2/8)           | 31.0<br>(9/29)              | 75.0<br>(3/4)            | 36.4<br>(12/33)        |
| >8mg/kg                                |                        | 0<br>(0/1)             | 0<br>(0/3)              | 0<br>(0/4)                  |                          | 0<br>(0/4)             |
| Missing                                | 0<br>(0/4)             | 33.3<br>(7/21)         | 100<br>(1/1)            | 30.8<br>(8/26)              | 40.0<br>(2/5)            | 32.3<br>(10/31)        |

% values are calculated based on the number of patients within the respective dose category (m/n);

\*Other includes atypical CAPS (n=18) and non-CAPS diagnoses (n=24); non-CAPS diagnoses include systemic juvenile idiopathic arthritis, unspecified autoinflammatory syndromes, familial Mediterranean fever, mevalonate kinase deficiency, adult-onset Still's disease, tumour necrosis factor-receptor associated periodic syndrome, Erdheim–Chester disease, Blau syndrome, and granulomatosis with polyangiitis.

CAPS, cryopyrin-associated periodic syndromes; FCAS, familial cold autoinflammatory syndrome; m, number of patients who reported at least one event; MWS, Muckle–Wells syndrome; n, number of patients within the respective dose category data; NOMID, neonatal-onset multisystem inflammatory disease.

**Table S7** Most common adverse events related to canakinumab per investigator assessment

| <b>System organ class</b><br><b>Preferred term</b>              | <b>All CAPS</b><br><b>(N=243)</b> | <b>All</b><br><b>(N=285)</b> |
|-----------------------------------------------------------------|-----------------------------------|------------------------------|
| <b>Any AE, n (IR/ 100 PY) [95% CI]</b>                          | 305 (33.2) [29.6, 37.2]           | 335 (31.7) [28.4, 35.2]      |
| <b>Infections and infestations</b>                              | 126 (13.7) [11.4, 16.3]           | 140 (13.2) [11.1, 15.6]      |
| Nasopharyngitis                                                 | 15 (1.6) [0.9, 2.7]               | 16 (1.5) [0.9, 2.5]          |
| Lower respiratory tract infection                               | 13 (1.4) [0.8, 2.4]               | 13 (1.2) [0.7, 2.1]          |
| Urinary tract infection                                         | 11 (1.2) [0.6, 2.1]               | 11 (1.0) [0.5, 1.9]          |
| Tonsillitis                                                     | 8 (0.9) [0.4, 1.7]                | 10 (0.9) [0.5, 1.7]          |
| Influenza                                                       | 9 (1.0) [0.4, 1.9]                | 9 (0.9) [0.4, 1.6]           |
| Bronchitis                                                      | 8 (0.9) [0.4, 1.7]                | 8 (0.8) [0.3, 1.5]           |
| Gastroenteritis                                                 | 4 (0.4) [0.1, 1.1]                | 5 (0.5) [0.2, 1.1]           |
| Pneumonia                                                       | 4 (0.4) [0.1, 1.1]                | 5 (0.5) [0.2, 1.1]           |
| Ear infection                                                   | 4 (0.4) [0.1, 1.1]                | 4 (0.4) [0.1, 1.0]           |
| Rhinitis                                                        | 4 (0.4) [0.1, 1.1]                | 4 (0.4) [0.1, 1.0]           |
| Viral infection                                                 | 2 (0.2) [0, 0.8]                  | 4 (0.4) [0.1, 1.0]           |
| Cellulitis                                                      | 3 (0.3) [0.1, 1.0]                | 3 (0.3) [0.1, 0.8]           |
| Herpes zoster                                                   | 3 (0.3) [0.1, 1.0]                | 3 (0.3) [0.1, 0.8]           |
| Hordeolum                                                       | 3 (0.3) [0.1, 1.0]                | 3 (0.3) [0.1, 0.8]           |
| Laryngitis                                                      | 3 (0.3) [0.1, 1.0]                | 3 (0.3) [0.1, 0.8]           |
| Upper respiratory tract infection                               | 1 (0.1) [0.0, 0.6]                | 3 (0.3) [0.1, 0.8]           |
| <b>General disorders and<br/>administration site conditions</b> | 33 (3.6) [2.5, 5.0]               | 37 (3.5) [2.5, 4.8]          |
| Fatigue                                                         | 5 (0.5) [0.2, 1.3]                | 6 (0.6) [0.2, 1.2]           |
| Pyrexia                                                         | 5 (0.5) [0.2, 1.3]                | 5 (0.5) [0.2, 1.1]           |

| <b>System organ class</b>                             | <b>All CAPS</b>     | <b>All</b>          |
|-------------------------------------------------------|---------------------|---------------------|
| <b>Preferred term</b>                                 | <b>(N=243)</b>      | <b>(N=285)</b>      |
| Vaccination site inflammation                         | 4 (0.4) [0.1, 1.1]  | 5 (0.5) [0.2, 1.1]  |
| Condition aggravated                                  | 3 (0.3) [0.1, 1.0]  | 3 (0.3) [0.1, 0.8]  |
| Injection site reaction                               | 3 (0.3) [0.1, 1.0]  | 3 (0.3) [0.1, 0.8]  |
| Malaise                                               | 2 (0.2) [0.0, 0.8]  | 3 (0.3) [0.1, 0.8]  |
| <b>Ear and labyrinth disorders</b>                    | 20 (2.2) [1.3, 3.4] | 20 (1.9) [1.2, 2.9] |
| Vertigo                                               | 16 (1.7) [1.0, 2.8] | 16 (1.5) [0.9, 2.5] |
| <b>Gastrointestinal disorders</b>                     | 18 (2.0) [1.2, 3.1] | 20 (1.9) [1.2, 2.9] |
| Abdominal pain upper                                  | 5 (0.5) [0.2, 1.3]  | 5 (0.5) [0.2, 1.1]  |
| Diarrhea                                              | 4 (0.4) [0.1, 1.1]  | 4 (0.4) [0.1, 1.0]  |
| Abdominal pain                                        | 3 (0.3) [0.1, 1.0]  | 3 (0.3) [0.1, 0.8]  |
| <b>Skin and subcutaneous tissue disorders</b>         | 17 (1.9) [1.1, 3.0] | 19 (1.8) [1.1, 2.8] |
| Rash                                                  | 3 (0.3) [0.1, 1.0]  | 4 (0.4) [0.1, 1.0]  |
| <b>Investigations</b>                                 | 17 (1.9) [1.1, 3.0] | 17 (1.6) [0.9, 2.6] |
| Weight increased                                      | 8 (0.9) [0.4, 1.7]  | 8 (0.8) [0.3, 1.5]  |
| <b>Injury, poisoning and procedural complications</b> | 16 (1.7) [1.0, 2.8] | 16 (1.5) [0.9, 2.5] |
| Vaccination complication                              | 4 (0.4) [0.1, 1.1]  | 4 (0.4) [0.1, 1.0]  |
| Procedural headache                                   | 3 (0.3) [0.1, 1.0]  | 3 (0.3) [0.1, 0.8]  |
| Procedural nausea                                     | 3 (0.3) [0.1, 1.0]  | 3 (0.3) [0.1, 0.8]  |
| <b>Nervous system disorders</b>                       | 16 (1.7) [1.0, 2.8] | 16 (1.5) [0.9, 2.5] |
| Headache                                              | 7 (0.8) [0.3, 1.6]  | 7 (0.7) [0.3, 1.4]  |
| Syncope                                               | 3 (0.3) [0.1, 1.0]  | 3 (0.3) [0.1, 0.8]  |



| <b>System organ class</b>                              | <b>All CAPS</b>     | <b>All</b>          |
|--------------------------------------------------------|---------------------|---------------------|
| <b>Preferred term</b>                                  | <b>(N=243)</b>      | <b>(N=285)</b>      |
| <b>Respiratory, thoracic and mediastinal disorders</b> | 13 (1.4) [0.8, 2.4] | 14 (1.3) [0.7, 2.2] |
| Cough                                                  | 5 (0.5) [0.2, 1.3]  | 5 (0.5) [0.2, 1.1]  |
| Oropharyngeal pain                                     | 4 (0.4) [0.1, 1.1]  | 5 (0.5) [0.2, 1.1]  |
| <b>Eye disorders</b>                                   | 7 (0.8) [0.3, 1.6]  | 8 (0.8) [0.3, 1.5]  |

Listed are study emergent events starting after baseline with an absolute frequency of  $\geq 5$  events per system organ class and  $\geq 3$  events per preferred term in the all registry patients group.

AE, adverse event; CAPS, cryopyrin-associated periodic syndromes; CI, confidence interval; IR, incidence rate; n, number of events; PY, patient-years.

**Table S8** Serious adverse events by preferred term by patient group (n=1 in all registry patients)

| Preferred term<br>n (IR/ 100 PY)<br>(95% CI) | FCAS<br>(n=42)        | MWS<br>(n=169)             | NOMID<br>(n=32)           | All CAPS<br>(n=243)       | Other*<br>(n=42)          | All<br>(n=285)             |
|----------------------------------------------|-----------------------|----------------------------|---------------------------|---------------------------|---------------------------|----------------------------|
| <b>All events</b>                            | 4 (2.6)<br>[0.7, 6.6] | 100 (15.4)<br>[12.6, 18.8] | 24 (21.1)<br>[13.5, 31.4] | 128 (14.0)<br>[11.6,16.6] | 27 (19.3)<br>[12.7, 28.1] | 155 (14.7)<br>[12.4, 17.2] |
| Anaemia                                      | 0<br>[0.0, 2.4]       | 1 (0.2)<br>[0.0, 0.9]      | 0<br>[0.0, 3.2]           | 1 (0.1)<br>[0.0, 0.6]     | 0<br>[0.0, 2.7]           | 1 (0.1)<br>[0.0, 0.5]      |
| Abdominal pain<br>upper                      | 0<br>[0.0, 2.4]       | 1 (0.2)<br>[0.0, 0.9]      | 0<br>[0.0, 3.2]           | 1 (0.1)<br>[0.0, 0.6]     | 0<br>[0.0, 2.7]           | 1 (0.1)<br>[0.00, 0.5]     |
| Abscess limb                                 | 0<br>[0.0, 2.4]       | 1 (0.2)<br>[0.0, 0.9]      | 0<br>[0.0, 3.2]           | 1 (0.1)<br>[0.0, 0.6]     | 0<br>[0.0, 2.7]           | 1 (0.1)<br>[0.0, 0.5]      |
| Acute respiratory<br>distress syndrome       | 0<br>[0.0, 2.4]       | 0<br>[0.0, 0.6]            | 0<br>[0.0, 3.2]           | 0<br>[0.0, 0.4]           | 1 (0.7)<br>[0.0, 4.0]     | 1 (0.1)<br>[0.0, 0.5]      |
| Adenocarcinoma                               | 0<br>[0.0, 2.4]       | 1 (0.2)<br>[0.0, 0.9]      | 0<br>[0.0, 3.2]           | 1 (0.1)<br>[0.0, 0.6]     | 0<br>[0.0, 2.7]           | 1 (0.1)<br>[0.0, 0.5]      |
| Appendicitis                                 | 0<br>[0.0, 2.4]       | 1 (0.2)<br>[0.0, 0.9]      | 0<br>[0.0, 3.2]           | 1 (0.1)<br>[0.0, 0.6]     | 0<br>[0.0, 2.7]           | 1 (0.1)<br>[0.0, 0.5]      |
| Arthralgia                                   | 0<br>[0.0, 2.4]       | 1 (0.2)<br>[0.0, 0.9]      | 0<br>[0.0, 3.2]           | 1 (0.1)<br>[0.0, 0.6]     | 0<br>[0.0, 2.7]           | 1 (0.1)<br>[0.0, 0.5]      |
| Autoimmune<br>hepatitis                      | 0<br>[0.0, 2.4]       | 0<br>[0.0, 0.6]            | 0<br>[0.0, 3.2]           | 0<br>[0.0, 0.4]           | 1 (0.7)<br>[0.0, 4.0]     | 1 (0.1)<br>[0.0, 0.5]      |
| Bacterial tracheitis                         | 0                     | 1 (0.2)                    | 0                         | 1 (0.1)<br>[0.0, 0.6]     | 0                         | 1 (0.1)<br>[0.0, 0.5]      |

| <b>Preferred term<br/>n (IR/ 100 PY)<br/>(95% CI)</b> | <b>FCAS<br/>(n=42)</b> | <b>MWS<br/>(n=169)</b> | <b>NOMID<br/>(n=32)</b> | <b>All CAPS<br/>(n=243)</b> | <b>Other*<br/>(n=42)</b> | <b>All<br/>(n=285)</b> |
|-------------------------------------------------------|------------------------|------------------------|-------------------------|-----------------------------|--------------------------|------------------------|
|                                                       | [0.0, 2.4]             | [0.0, 0.9]             | [0.0, 3.2]              |                             | [0.0, 2.7]               |                        |
| Blindness                                             | 0<br>[0.0, 2.4]        | 1 (0.2)<br>[0.0, 0.9]  | 0<br>[0.0, 3.2]         | 1 (0.1)<br>[0.0, 0.6]       | 0<br>[0.0, 2.7]          | 1 (0.1)<br>[0.0, 0.5]  |
| Brain mass                                            | 0<br>[0.0, 2.4]        | 1 (0.2)<br>[0.0, 0.9]  | 0<br>[0.0, 3.2]         | 1 (0.1)<br>[0.0, 0.6]       | 0<br>[0.0, 2.7]          | 1 (0.1)<br>[0.0, 0.5]  |
| Bursitis                                              | 0<br>[0.0, 2.4]        | 0<br>[0.0, 0.6]        | 0<br>[0.0, 3.2]         | 0<br>[0.0, 0.4]             | 1 (0.7)<br>[0.0, 4.0]    | 1 (0.1)<br>[0.0, 0.5]  |
| Cerebral infarction                                   | 1 (0.6)<br>[0.0, 3.6]  | 0<br>[0.0, 0.6]        | 0<br>[0.0, 3.2]         | 1 (0.1)<br>[0.0, 0.6]       | 0<br>[0.0, 2.7]          | 1 (0.1)<br>[0.0, 0.5]  |
| Cholecystitis                                         | 0<br>[0.0, 2.4]        | 1 (0.2)<br>[0.0, 0.9]  | 0<br>[0.0, 3.2]         | 1 (0.1)<br>[0.0, 0.6]       | 0<br>[0.0, 2.7]          | 1 (0.1)<br>[0.0, 0.5]  |
| Cholestasis                                           | 0<br>[0.0, 2.4]        | 0<br>[0.0, 0.6]        | 0<br>[0.0, 3.2]         | 0<br>[0.0, 0.4]             | 1 (0.7)<br>[0.0, 4.0]    | 1 (0.1)<br>[0.0, 0.5]  |
| Chronic sinusitis                                     | 0<br>[0.0, 2.4]        | 1 (0.2)<br>[0.0, 0.9]  | 0<br>[0.0, 3.2]         | 1 (0.1)<br>[0.0, 0.6]       | 0<br>[0.0, 2.7]          | 1 (0.1)<br>[0.0, 0.5]  |
| Circulatory collapse                                  | 0<br>[0.0, 2.4]        | 1 (0.2)<br>[0.0, 0.9]  | 0<br>[0.0, 3.2]         | 1 (0.1)<br>[0.0, 0.6]       | 0<br>[0.0, 2.7]          | 1 (0.1)<br>[0.0, 0.5]  |
| Conjunctivitis                                        | 0<br>[0.0, 2.4]        | 1 (0.2)<br>[0.0, 0.9]  | 0<br>[0.0, 3.2]         | 1 (0.1)<br>[0.0, 0.6]       | 0<br>[0.0, 2.7]          | 1 (0.1)<br>[0.0, 0.5]  |

| <b>Preferred term<br/>n (IR/ 100 PY)<br/>(95% CI)</b> | <b>FCAS<br/>(n=42)</b> | <b>MWS<br/>(n=169)</b> | <b>NOMID<br/>(n=32)</b> | <b>All CAPS<br/>(n=243)</b> | <b>Other*<br/>(n=42)</b> | <b>All<br/>(n=285)</b> |
|-------------------------------------------------------|------------------------|------------------------|-------------------------|-----------------------------|--------------------------|------------------------|
| Constipation                                          | 0<br>[0.0, 2.4]        | 1 (0.2)<br>[0.0, 0.9]  | 0<br>[0.0, 3.2]         | 1 (0.1)<br>[0.0, 0.6]       | 0<br>[0.0, 2.7]          | 1 (0.1)<br>[0.0, 0.5]  |
| Coronary artery disease                               | 0<br>[0.0, 2.4]        | 1 (0.2)<br>[0.0, 0.9]  | 0<br>[0.0, 3.2]         | 1 (0.1)<br>[0.0, 0.6]       | 0<br>[0.0, 2.7]          | 1 (0.1)<br>[0.0, 0.5]  |
| Cough                                                 | 0<br>[0.0, 2.4]        | 1 (0.2)<br>[0.0, 0.9]  | 0<br>[0.0, 3.2]         | 1 (0.1)<br>[0.0, 0.6]       | 0<br>[0.0, 2.7]          | 1 (0.1)<br>[0.0, 0.5]  |
| Deafness                                              | 0<br>[0.0, 2.4]        | 0<br>[0.0, 0.6]        | 1 (0.9)<br>[0.0, 4.9]   | 1 (0.1)<br>[0.0, 0.6]       | 0<br>[0.0, 2.7]          | 1 (0.1)<br>[0.0, 0.5]  |
| Demyelination                                         | 0<br>[0.0, 2.4]        | 1 (0.2)<br>[0.0, 0.9]  | 0<br>[0.0, 3.2]         | 1 (0.1)<br>[0.0, 0.6]       | 0<br>[0.0, 2.7]          | 1 (0.1)<br>[0.0, 0.5]  |
| Diabetes mellitus                                     | 0<br>[0.0, 2.4]        | 1 (0.2)<br>[0.0, 0.9]  | 0<br>[0.0, 3.2]         | 1 (0.1)<br>[0.0, 0.6]       | 0<br>[0.0, 2.7]          | 1 (0.1)<br>[0.0, 0.5]  |
| Diplopia                                              | 0<br>[0.0, 2.4]        | 0<br>[0.0, 0.6]        | 1 (0.9)<br>[0.0, 4.9]   | 1 (0.1)<br>[0.0, 0.6]       | 0<br>[0.0, 2.7]          | 1 (0.1)<br>[0.0, 0.5]  |
| Diverticulitis                                        | 0<br>[0.0, 2.4]        | 1 (0.2)<br>[0.0, 0.9]  | 0<br>[0.0, 3.2]         | 1 (0.1)<br>[0.0, 0.6]       | 0<br>[0.0, 2.7]          | 1 (0.1)<br>[0.0, 0.5]  |
| Drug hypersensitivity                                 | 0<br>[0.0, 2.4]        | 0<br>[0.0, 0.6]        | 0<br>[0.0, 3.2]         | 0<br>[0.0, 0.4]             | 1 (0.7)<br>[0.0, 4.0]    | 1 (0.1)<br>[0.0, 0.5]  |
| Dyspnoea                                              | 0<br>[0.0, 2.4]        | 0<br>[0.0, 0.6]        | 0<br>[0.0, 3.2]         | 0<br>[0.0, 0.4]             | 1 (0.7)<br>[0.0, 4.0]    | 1 (0.1)<br>[0.0, 0.5]  |

| <b>Preferred term<br/>n (IR/ 100 PY)<br/>(95% CI)</b> | <b>FCAS<br/>(n=42)</b> | <b>MWS<br/>(n=169)</b> | <b>NOMID<br/>(n=32)</b> | <b>All CAPS<br/>(n=243)</b> | <b>Other*<br/>(n=42)</b> | <b>All<br/>(n=285)</b> |
|-------------------------------------------------------|------------------------|------------------------|-------------------------|-----------------------------|--------------------------|------------------------|
| Endometriosis                                         | 0<br>[0.0, 2.4]        | 1 (0.2)<br>[0.0, 0.9]  | 0<br>[0.0, 3.2]         | 1 (0.1)<br>[0.0, 0.6]       | 0<br>[0.0, 2.7]          | 1 (0.1)<br>[0.0, 0.5]  |
| Enterocolitis                                         | 0<br>[0.0, 2.4]        | 0<br>[0.0, 0.6]        | 0<br>[0.0, 3.2]         | 0<br>[0.0, 0.4]             | 1 (0.7)<br>[0.0, 4.0]    | 1 (0.1)<br>[0.0, 0.5]  |
| Epilepsy                                              | 0<br>[0.0, 2.4]        | 0<br>[0.0, 0.6]        | 1 (0.9)<br>[0.0, 4.9]   | 1 (0.1)<br>[0.0, 0.6]       | 0<br>[0.0, 2.7]          | 1 (0.1)<br>[0.0, 0.5]  |
| Epstein-Barr virus<br>infection                       | 0<br>[0.0, 2.4]        | 0<br>[0.0, 0.6]        | 0<br>[0.0, 3.2]         | 0<br>[0.0, 0.4]             | 1 (0.7)<br>[0.0, 4.0]    | 1 (0.1)<br>[0.0, 0.5]  |
| Erysipelas                                            | 0<br>[0.0, 2.4]        | 0<br>[0.0, 0.6]        | 1 (0.9)<br>[0.0, 4.9]   | 1 (0.1)<br>[0.0, 0.6]       | 0<br>[0.0, 2.7]          | 1 (0.1)<br>[0.0, 0.5]  |
| Facial bone<br>fracture                               | 0<br>[0.0, 2.4]        | 1 (0.2)<br>[0.0, 0.9]  | 0<br>[0.0, 3.2]         | 1 (0.1)<br>[0.0, 0.6]       | 0<br>[0.0, 2.7]          | 1 (0.1)<br>[0.0, 0.5]  |
| Familial<br>Mediterranean<br>fever                    | 0<br>[0.0, 2.4]        | 0<br>[0.0, 0.6]        | 0<br>[0.0, 3.2]         | 0<br>[0.0, 0.4]             | 1 (0.7)<br>[0.0, 4.0]    | 1 (0.1)<br>[0.0, 0.5]  |
| Femur fracture                                        | 0<br>[0.0, 2.4]        | 0<br>[0.0, 0.6]        | 0<br>[0.0, 3.2]         | 0<br>[0.0, 0.4]             | 1 (0.7)<br>[0.0, 4.0]    | 1 (0.1)<br>[0.0, 0.5]  |
| Gastroenteritis                                       | 0<br>[0.0, 2.4]        | 0<br>[0.0, 0.6]        | 0<br>[0.0, 3.2]         | 0<br>[0.0, 0.4]             | 1 (0.7)<br>[0.0, 4.0]    | 1 (0.1)<br>[0.0, 0.5]  |
| Gastroenteritis<br>rotavirus                          | 0<br>[0.0, 2.4]        | 0<br>[0.0, 0.6]        | 0<br>[0.0, 3.2]         | 0<br>[0.0, 0.4]             | 1 (0.7)<br>[0.0, 4.0]    | 1 (0.1)<br>[0.0, 0.5]  |

| <b>Preferred term<br/>n (IR/ 100 PY)<br/>(95% CI)</b> | <b>FCAS<br/>(n=42)</b> | <b>MWS<br/>(n=169)</b> | <b>NOMID<br/>(n=32)</b> | <b>All CAPS<br/>(n=243)</b> | <b>Other*<br/>(n=42)</b> | <b>All<br/>(n=285)</b> |
|-------------------------------------------------------|------------------------|------------------------|-------------------------|-----------------------------|--------------------------|------------------------|
| Gastrointestinal neoplasm                             | 0<br>[0.0, 2.4]        | 1 (0.2)<br>[0.0, 0.9]  | 0<br>[0.0, 3.2]         | 1 (0.1)<br>[0.0, 0.6]       | 0<br>[0.0, 2.7]          | 1 (0.1)<br>[0.0, 0.5]  |
| Gastrointestinal toxicity                             | 0<br>[0.0, 2.4]        | 0<br>[0.0, 0.6]        | 0<br>[0.0, 3.2]         | 0<br>[0.0, 0.4]             | 1 (0.7)<br>[0.0, 4.0]    | 1 (0.1)<br>[0.0, 0.5]  |
| Gastrooesophageal reflux disease                      | 0<br>[0.0, 2.4]        | 1 (0.2)<br>[0.0, 0.9]  | 0<br>[0.0, 3.2]         | 1 (0.1)<br>[0.0, 0.6]       | 0<br>[0.0, 2.7]          | 1 (0.1)<br>[0.0, 0.5]  |
| Haemoglobin decreased                                 | 0<br>[0.0, 2.4]        | 1 (0.2)<br>[0.0, 0.9]  | 0<br>[0.0, 3.2]         | 1 (0.1)<br>[0.0, 0.6]       | 0<br>[0.0, 2.7]          | 1 (0.1)<br>[0.0, 0.5]  |
| Hepatitis                                             | 0<br>[0.0, 2.4]        | 0<br>[0.0, 0.6]        | 0<br>[0.0, 3.2]         | 0<br>[0.0, 0.4]             | 1 (0.7)<br>[0.0, 4.0]    | 1 (0.1)<br>[0.0, 0.5]  |
| Herpes zoster                                         | 0<br>[0.0, 2.4]        | 1 (0.2)<br>[0.0, 0.9]  | 0<br>[0.0, 3.2]         | 1 (0.1)<br>[0.0, 0.6]       | 0<br>[0.0, 2.7]          | 1 (0.1)<br>[0.0, 0.5]  |
| Hyperhidrosis                                         | 0<br>[0.0, 2.4]        | 1 (0.2)<br>[0.0, 0.9]  | 0<br>[0.0, 3.2]         | 1 (0.1)<br>[0.0, 0.6]       | 0<br>[0.0, 2.7]          | 1 (0.1)<br>[0.0, 0.5]  |
| Impaired healing                                      | 0<br>[0.0, 2.4]        | 0<br>[0.0, 0.6]        | 1 (0.9)<br>[0.0, 4.9]   | 1 (0.1)<br>[0.0, 0.6]       | 0<br>[0.0, 2.7]          | 1 (0.1)<br>[0.0, 0.5]  |
| Infection susceptibility increased                    | 0<br>[0.0, 2.4]        | 1 (0.2)<br>[0.0, 0.9]  | 0<br>[0.0, 3.2]         | 1 (0.1)<br>[0.0, 0.6]       | 0<br>[0.0, 2.7]          | 1 (0.1)<br>[0.0, 0.5]  |
| Influenza                                             | 0<br>[0.0, 2.4]        | 1 (0.2)<br>[0.0, 0.9]  | 0<br>[0.0, 3.2]         | 1 (0.1)<br>[0.0, 0.6]       | 0<br>[0.0, 2.7]          | 1 (0.1)<br>[0.0, 0.5]  |

| <b>Preferred term<br/>n (IR/ 100 PY)<br/>(95% CI)</b> | <b>FCAS<br/>(n=42)</b> | <b>MWS<br/>(n=169)</b> | <b>NOMID<br/>(n=32)</b> | <b>All CAPS<br/>(n=243)</b> | <b>Other*<br/>(n=42)</b> | <b>All<br/>(n=285)</b> |
|-------------------------------------------------------|------------------------|------------------------|-------------------------|-----------------------------|--------------------------|------------------------|
| Inguinal hernia                                       | 0<br>[0.0, 2.4]        | 0<br>[0.0, 0.6]        | 0<br>[0.0, 3.2]         | 0<br>[0.0, 0.4]             | 1 (0.7)<br>[0.0, 4.0]    | 1 (0.1)<br>[0.0, 0.5]  |
| Intervertebral disc protrusion                        | 0<br>[0.0, 2.4]        | 1 (0.2)<br>[0.0, 0.9]  | 0<br>[0.0, 3.2]         | 1 (0.1)<br>[0.0, 0.6]       | 0<br>[0.0, 2.7]          | 1 (0.1)<br>[0.0, 0.5]  |
| Localised oedema                                      | 0<br>[0.0, 2.4]        | 0<br>[0.0, 0.6]        | 0<br>[0.0, 3.2]         | 0<br>[0.0, 0.4]             | 1 (0.7)<br>[0.0, 4.0]    | 1 (0.1)<br>[0.0, 0.5]  |
| Lumbar spinal stenosis                                | 0<br>[0.0, 2.4]        | 1 (0.2)<br>[0.0, 0.9]  | 0<br>[0.0, 3.2]         | 1 (0.1)<br>[0.0, 0.6]       | 0<br>[0.0, 2.7]          | 1 (0.1)<br>[0.0, 0.5]  |
| Lymphadenopathy                                       | 0<br>[0.0, 2.4]        | 1 (0.2)<br>[0.0, 0.9]  | 0<br>[0.0, 3.2]         | 1 (0.1)<br>[0.0, 0.6]       | 0<br>[0.0, 2.7]          | 1 (0.1)<br>[0.0, 0.5]  |
| Malaise                                               | 0<br>[0.0, 2.4]        | 1 (0.2)<br>[0.0, 0.9]  | 0<br>[0.0, 3.2]         | 1 (0.1)<br>[0.0, 0.6]       | 0<br>[0.0, 2.7]          | 1 (0.1)<br>[0.0, 0.5]  |
| Meningitis aseptic                                    | 0<br>[0.0, 2.4]        | 0<br>[0.0, 0.6]        | 1 (0.9)<br>[0.0, 4.9]   | 1 (0.1)<br>[0.0, 0.6]       | 0<br>[0.0, 2.7]          | 1 (0.1)<br>[0.0, 0.5]  |
| Meningitis bacterial                                  | 0<br>[0.0, 2.4]        | 1 (0.2)<br>[0.0, 0.9]  | 0<br>[0.0, 3.2]         | 1 (0.1)<br>[0.0, 0.6]       | 0<br>[0.0, 2.7]          | 1 (0.1)<br>[0.0, 0.5]  |
| Mitral valve incompetence                             | 0<br>[0.0, 2.4]        | 1 (0.2)<br>[0.0, 0.9]  | 0<br>[0.0, 3.2]         | 1 (0.1)<br>[0.0, 0.6]       | 0<br>[0.0, 2.7]          | 1 (0.1)<br>[0.0, 0.5]  |
| Myalgia                                               | 0<br>[0.0, 2.4]        | 0<br>[0.0, 0.6]        | 0<br>[0.0, 3.2]         | 0<br>[0.0, 0.4]             | 1 (0.7)<br>[0.0, 4.0]    | 1 (0.1)<br>[0.0, 0.5]  |

| <b>Preferred term<br/>n (IR/ 100 PY)<br/>(95% CI)</b> | <b>FCAS<br/>(n=42)</b> | <b>MWS<br/>(n=169)</b> | <b>NOMID<br/>(n=32)</b> | <b>All CAPS<br/>(n=243)</b> | <b>Other*<br/>(n=42)</b> | <b>All<br/>(n=285)</b> |
|-------------------------------------------------------|------------------------|------------------------|-------------------------|-----------------------------|--------------------------|------------------------|
| Nervous system disorder                               | 0<br>[0.0, 2.4]        | 1 (0.2)<br>[0.0, 0.9]  | 0<br>[0.0, 3.2]         | 1 (0.1)<br>[0.0, 0.6]       | 0<br>[0.0, 2.7]          | 1 (0.1)<br>[0.0, 0.5]  |
| Neurilemmoma benign                                   | 0<br>[0.0, 2.4]        | 1 (0.2)<br>[0.0, 0.9]  | 0<br>[0.0, 3.2]         | 1 (0.1)<br>[0.0, 0.6]       | 0<br>[0.0, 2.7]          | 1 (0.1)<br>[0.0, 0.5]  |
| Oral herpes                                           | 0<br>[0.0, 2.4]        | 1 (0.2)<br>[0.0, 0.9]  | 0<br>[0.0, 3.2]         | 1 (0.1)<br>[0.0, 0.6]       | 0<br>[0.0, 2.7]          | 1 (0.1)<br>[0.0, 0.5]  |
| Overdose                                              | 1 (0.6)<br>[0.0, 3.6]  | 0<br>[0.0, 0.6]        | 0<br>[0.0, 3.2]         | 1 (0.1)<br>[0.0, 0.6]       | 0<br>[0.0, 2.7]          | 1 (0.1)<br>[0.0, 0.5]  |
| Parvovirus B19 infection                              | 0<br>[0.0, 2.4]        | 0<br>[0.0, 0.6]        | 0<br>[0.0, 3.2]         | 0<br>[0.0, 0.4]             | 1 (0.7)<br>[0.0, 4.0]    | 1 (0.1)<br>[0.0, 0.5]  |
| Pericardial effusion                                  | 0<br>[0.0, 2.4]        | 0<br>[0.0, 0.6]        | 0<br>[0.0, 3.2]         | 0<br>[0.0, 0.4]             | 1 (0.7)<br>[0.0, 4.0]    | 1 (0.1)<br>[0.0, 0.5]  |
| Periorbital cellulitis                                | 0<br>[0.0, 2.4]        | 1 (0.2)<br>[0.0, 0.9]  | 0<br>[0.0, 3.2]         | 1 (0.1)<br>[0.0, 0.6]       | 0<br>[0.0, 2.7]          | 1 (0.1)<br>[0.0, 0.5]  |
| Peripheral arterial occlusive disease                 | 0<br>[0.0, 2.4]        | 1 (0.2)<br>[0.0, 0.9]  | 0<br>[0.0, 3.2]         | 1 (0.1)<br>[0.0, 0.6]       | 0<br>[0.0, 2.7]          | 1 (0.1)<br>[0.0, 0.5]  |
| Pharyngitis                                           | 0<br>[0.0, 2.4]        | 1 (0.2)<br>[0.0, 0.9]  | 0<br>[0.0, 3.2]         | 1 (0.1)<br>[0.0, 0.6]       | 0<br>[0.0, 2.7]          | 1 (0.1)<br>[0.0, 0.5]  |
| Postoperative wound infection                         | 0<br>[0.0, 2.4]        | 0<br>[0.0, 0.6]        | 0<br>[0.0, 3.2]         | 0<br>[0.0, 0.4]             | 1 (0.7)<br>[0.0, 4.0]    | 1 (0.1)<br>[0.0, 0.5]  |



| <b>Preferred term<br/>n (IR/ 100 PY)<br/>(95% CI)</b> | <b>FCAS<br/>(n=42)</b> | <b>MWS<br/>(n=169)</b> | <b>NOMID<br/>(n=32)</b> | <b>All CAPS<br/>(n=243)</b> | <b>Other*<br/>(n=42)</b> | <b>All<br/>(n=285)</b> |
|-------------------------------------------------------|------------------------|------------------------|-------------------------|-----------------------------|--------------------------|------------------------|
| Post procedural haemorrhage                           | 0<br>[0.0, 2.4]        | 1 (0.2)<br>[0.0, 0.9]  | 0<br>[0.0, 3.2]         | 1 (0.1)<br>[0.0, 0.6]       | 0<br>[0.0, 2.7]          | 1 (0.1)<br>[0.0, 0.5]  |
| Pregnancy                                             | 0<br>[0.0, 2.4]        | 1 (0.2)<br>[0.0, 0.9]  | 0<br>[0.0, 3.2]         | 1 (0.1)<br>[0.0, 0.6]       | 0<br>[0.0, 2.7]          | 1 (0.1)<br>[0.0, 0.5]  |
| Prostate cancer                                       | 0<br>[0.0, 2.4]        | 1 (0.2)<br>[0.0, 0.9]  | 0<br>[0.0, 3.2]         | 1 (0.1)<br>[0.0, 0.6]       | 0<br>[0.0, 2.7]          | 1 (0.1)<br>[0.0, 0.5]  |
| Radius fracture                                       | 1 (0.6)<br>[0.0, 3.6]  | 0<br>[0.0, 0.6]        | 0<br>[0.0, 3.2]         | 1 (0.1)<br>[0.0, 0.6]       | 0<br>[0.0, 2.7]          | 1 (0.1)<br>[0.0, 0.5]  |
| Rash                                                  | 0<br>[0.0, 2.4]        | 1 (0.2)<br>[0.0, 0.9]  | 0<br>[0.0, 3.2]         | 1 (0.1)<br>[0.0, 0.6]       | 0<br>[0.0, 2.7]          | 1 (0.1)<br>[0.0, 0.5]  |
| Rash generalised                                      | 0<br>[0.0, 2.4]        | 1 (0.2)<br>[0.0, 0.9]  | 0<br>[0.0, 3.2]         | 1 (0.1)<br>[0.0, 0.6]       | 0<br>[0.0, 2.7]          | 1 (0.1)<br>[0.0, 0.5]  |
| Rib fracture                                          | 0<br>[0.0, 2.4]        | 1 (0.2)<br>[0.0, 0.9]  | 0<br>[0.0, 3.2]         | 1 (0.1)<br>[0.0, 0.6]       | 0<br>[0.0, 2.7]          | 1 (0.1)<br>[0.0, 0.5]  |
| Seizure                                               | 0<br>[0.0, 2.4]        | 1 (0.2)<br>[0.0, 0.9]  | 0<br>[0.0, 3.2]         | 1 (0.1)<br>[0.0, 0.6]       | 0<br>[0.0, 2.7]          | 1 (0.1)<br>[0.0, 0.5]  |
| Subcutaneous abscess                                  | 0<br>[0.0, 2.4]        | 1 (0.2)<br>[0.0, 0.9]  | 0<br>[0.0, 3.2]         | 1 (0.1)<br>[0.0, 0.6]       | 0<br>[0.0, 2.7]          | 1 (0.1)<br>[0.0, 0.5]  |
| Sudden hearing loss                                   | 0<br>[0.0, 2.4]        | 1 (0.2)<br>[0.0, 0.9]  | 0<br>[0.0, 3.2]         | 1 (0.1)<br>[0.0, 0.6]       | 0<br>[0.0, 2.7]          | 1 (0.1)<br>[0.0, 0.5]  |

| <b>Preferred term<br/>n (IR/ 100 PY)<br/>(95% CI)</b> | <b>FCAS<br/>(n=42)</b> | <b>MWS<br/>(n=169)</b> | <b>NOMID<br/>(n=32)</b> | <b>All CAPS<br/>(n=243)</b> | <b>Other*<br/>(n=42)</b> | <b>All<br/>(n=285)</b> |
|-------------------------------------------------------|------------------------|------------------------|-------------------------|-----------------------------|--------------------------|------------------------|
| Syncope                                               | 0<br>[0.0, 2.4]        | 1 (0.2)<br>[0.0, 0.9]  | 0<br>[0.0, 3.2]         | 1 (0.1)<br>[0.0, 0.6]       | 0<br>[0.0, 2.7]          | 1 (0.1)<br>[0.0, 0.5]  |
| Synovial cyst                                         | 0<br>[0.0, 2.4]        | 1 (0.2)<br>[0.0, 0.9]  | 0<br>[0.0, 3.2]         | 1 (0.1)<br>[0.0, 0.6]       | 0<br>[0.0, 2.7]          | 1 (0.1)<br>[0.0, 0.5]  |
| Upper respiratory tract infection                     | 0<br>[0.0, 2.4]        | 0<br>[0.0, 0.6]        | 0<br>[0.0, 3.2]         | 0<br>[0.0, 0.4]             | 1 (0.7)<br>[0.0, 4.0]    | 1 (0.1)<br>[0.0, 0.5]  |
| Uterine leiomyoma                                     | 0<br>[0.0, 2.4]        | 1 (0.2)<br>[0.0, 0.9]  | 0<br>[0.0, 3.2]         | 1 (0.1)<br>[0.0, 0.6]       | 0<br>[0.0, 2.7]          | 1 (0.1)<br>[0.0, 0.5]  |
| Vaccination complication                              | 0<br>[0.0, 2.4]        | 1 (0.2)<br>[0.0, 0.9]  | 0<br>[0.0, 3.2]         | 1 (0.1)<br>[0.0, 0.6]       | 0<br>[0.0, 2.7]          | 1 (0.1)<br>[0.0, 0.5]  |
| Vaccination site cellulitis                           | 0<br>[0.0, 2.4]        | 1 (0.2)<br>[0.0, 0.9]  | 0<br>[0.0, 3.2]         | 1 (0.1)<br>[0.0, 0.6]       | 0<br>[0.0, 2.7]          | 1 (0.1)<br>[0.0, 0.5]  |
| Ventricular tachycardia                               | 0<br>[0.0, 2.4]        | 0<br>[0.0, 0.6]        | 0<br>[0.0, 3.2]         | 0<br>[0.0, 0.4]             | 1 (0.7)<br>[0.0, 4.0]    | 1 (0.1)<br>[0.0, 0.5]  |
| Vomiting                                              | 0<br>[0.0, 2.4]        | 0<br>[0.0, 0.6]        | 0<br>[0.0, 3.2]         | 0<br>[0.0, 0.4]             | 1 (0.7)<br>[0.0, 4.0]    | 1 (0.1)<br>[0.0, 0.5]  |
| Wound infection                                       | 0<br>[0.0, 2.4]        | 1 (0.2)<br>[0.0, 0.9]  | 0<br>[0.0, 3.2]         | 1 (0.1)<br>[0.0, 0.6]       | 0<br>[0.0, 2.7]          | 1 (0.1)<br>[0.0, 0.5]  |

| Preferred term<br>n (IR/ 100 PY)<br>(95% CI) | FCAS<br>(n=42) | MWS<br>(n=169) | NOMID<br>(n=32) | All CAPS<br>(n=243) | Other*<br>(n=42) | All<br>(n=285) |
|----------------------------------------------|----------------|----------------|-----------------|---------------------|------------------|----------------|
|                                              |                |                |                 |                     |                  |                |

Number of events  $\geq 2$  in all registry patients are presented in **Table 2** of the manuscript

\*Other includes atypical CAPS (n=18) and non-CAPS diagnoses (n=24); non-CAPS diagnoses include systemic juvenile idiopathic arthritis, unspecified autoinflammatory syndromes, familial Mediterranean fever, mevalonate kinase deficiency, adult-onset Still's disease, tumour necrosis factor-receptor associated periodic syndrome, Erdheim–Chester disease, Blau syndrome, and granulomatosis with polyangiitis.

CAPS, cryopyrin-associated periodic syndromes; CI, confidence interval; FCAS, familial cold autoinflammatory syndrome; IR, incidence rate; MWS, Muckle–Wells syndrome; n, number of events, NOMID, neonatal-onset multisystem inflammatory disease; PY, patient-years.

**Figure S1** Physician's Global Assessment of autoinflammatory disease activity and CRP/SAA levels over time

**A. CAPS phenotypes**

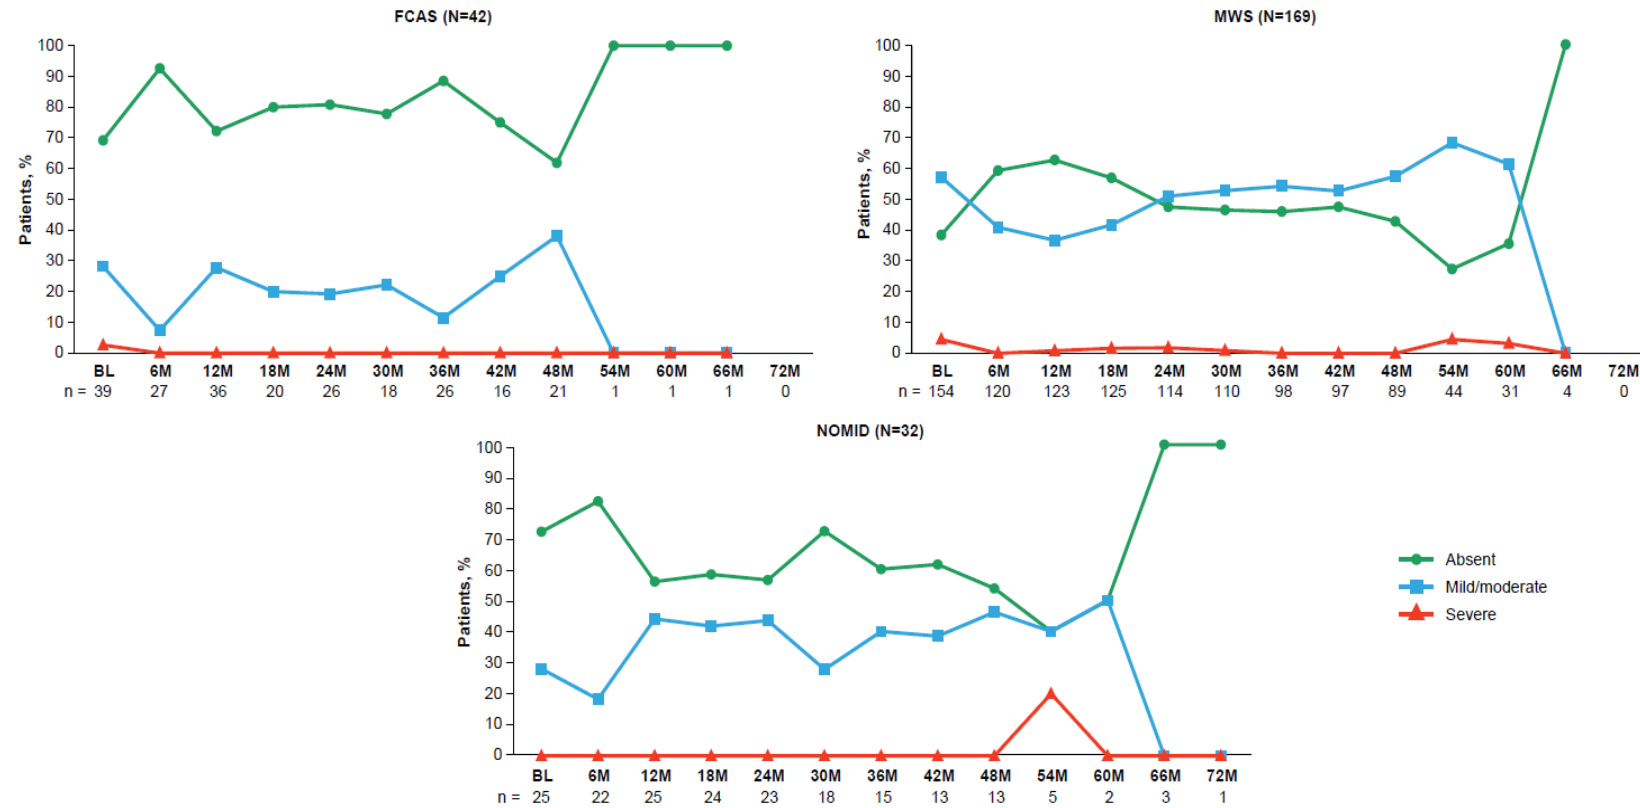

**B. Exposure to anti-IL-1 treatment\***

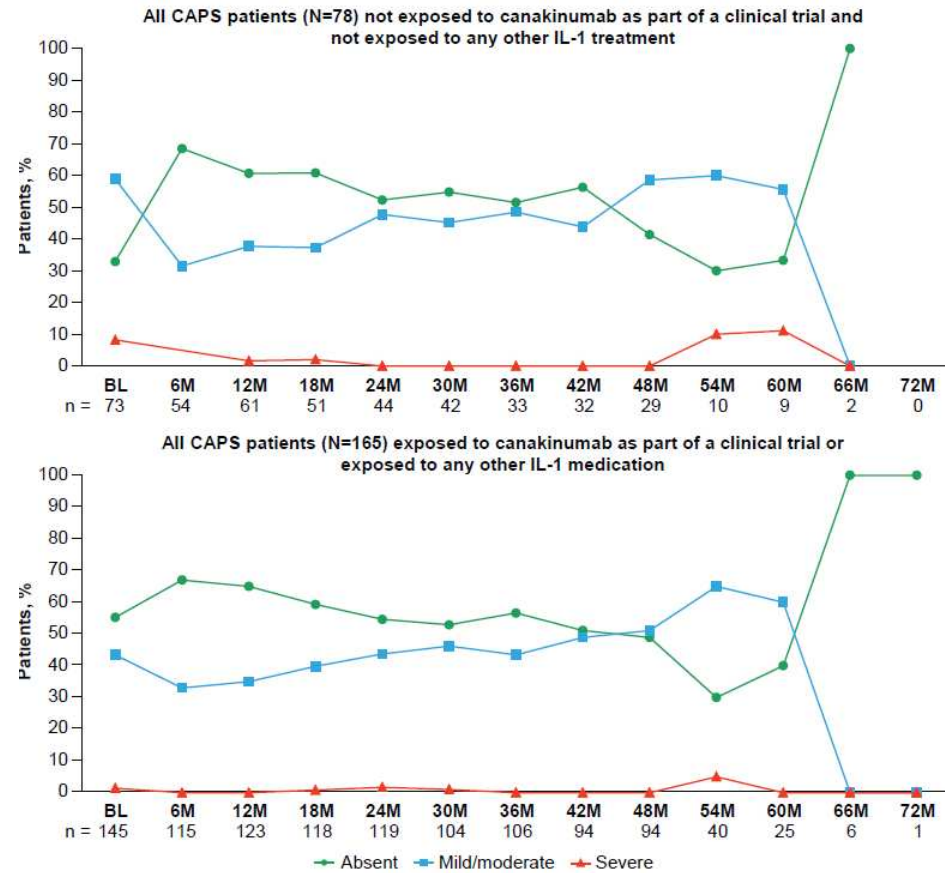

C. CRP and SAA levels over time

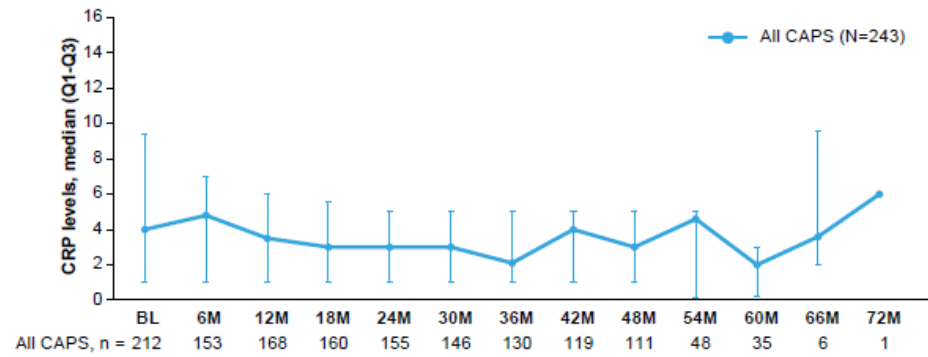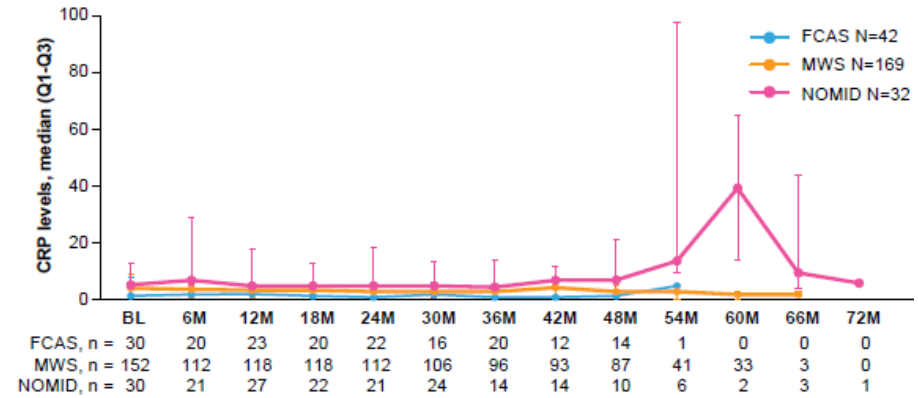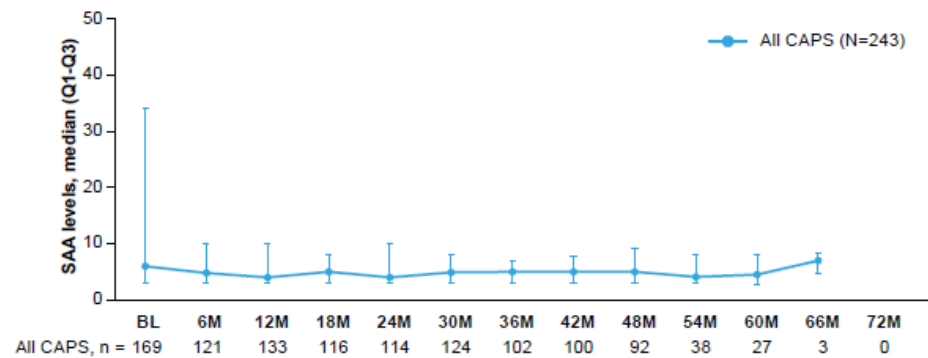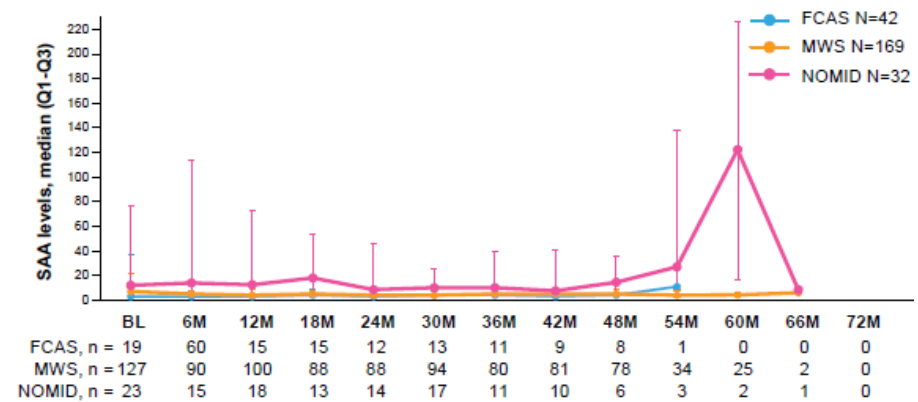

Panel A shows the PGA over time in FCAS, MWS or NOMID patients

Panel B shows PGA over time in All CAPS patients with or without exposure to anti-IL-1 treatment (including canakinumab) prior to enrolment

Panel C shows the CRP and SAA levels over time in ALL CAPS and 'Other' patients group

Percentages are based on the number of available patients at the respective time point

\*Patients not exposed to canakinumab as part of a clinical trial and not exposed to any other IL-1 treatment might have started to use marketed canakinumab several weeks before the beginning of the registry.

N, number of evaluable patients; n, number of patients available for assessment at each time point; vertical bars represent Q1 and Q3

BL, baseline; CAPS, cryopyrin-associated periodic syndromes; CRP, C-reactive protein; FCAS, familial cold autoinflammatory syndrome; IL, interleukin; M, months; MWS, Muckle–Wells syndrome; N, number of evaluable patients; n, number of patients available for assessment at each time point; NOMID, neonatal-onset multisystem inflammatory disease; PGA, Physician's Global Assessment; Q, quartile; SAA, serum amyloid A.
